# Supplementary material for: Comparison of chemical-use between hydraulic fracturing, acidizing, and routine oil and gas development
Source: PubMed Central journal article supplement (PMC5396893; doi:10.1371/journal.pone.0175344), 2017-04-19
Supplement: pone.0175344.s001.pdf [file pone.0175344.s001.pdf]

**S1 Table. Constituents used for routine oil and gas development activities (exclusive of well stimulation) in the SCAQMD, June 4, 2013 to September 2, 2015, sorted by frequency of use. Total number of events is 1,187.**

| <b>Rank</b> | <b>Constituent</b>                                       | <b>CASRN</b> | <b>Freq. of use (%)</b> | <b>Total mass (kg)</b> | <b>Median mass per event (kg)</b> | <b>Mean mass per event (kg)</b> | <b>Min mass per event (kg)</b> | <b>Max mass per event (kg)</b> |
|-------------|----------------------------------------------------------|--------------|-------------------------|------------------------|-----------------------------------|---------------------------------|--------------------------------|--------------------------------|
| 1           | Water base fluid                                         | 7732-18-5    | 97.6%                   | 196,128,245            | 48,118                            | 169,515                         | <0.1                           | 4,483,250                      |
| 2           | Methanol                                                 | 67-56-1      | 75.7%                   | 43,898                 | 20                                | 49                              | <0.1                           | 811                            |
| 3           | Sodium chloride                                          | 7647-14-5    | 74.9%                   | 1,647,927              | 10                                | 1,854                           | <0.1                           | 453,835                        |
| 4           | Polyoxyalkylenes                                         | Proprietary  | 65.4%                   | --                     | --                                | --                              | --                             | --                             |
| 5           | Citric acid                                              | 77-92-9      | 60.1%                   | 98,553                 | 91                                | 133                             | 0.1                            | 7,034                          |
| 6           | Formaldehyde                                             | 50-00-0      | 57.0%                   | 33                     | <0.1                              | <0.1                            | <0.1                           | 1.9                            |
| 7           | Hydrochloric acid                                        | 7647-01-0    | 54.8%                   | 1,165,757              | 1,311                             | 1,791                           | 10                             | 12,052                         |
| 8           | Propargyl alcohol                                        | 107-19-7     | 53.8%                   | 2,926                  | 3.7                               | 4.6                             | <0.1                           | 24                             |
| 9           | Ammonium chloride                                        | 12125-02-9   | 48.4%                   | 421,116                | 454                               | 732                             | <0.1                           | 18,847                         |
| 10          | Naphthalene                                              | 91-20-3      | 48.4%                   | 503                    | 0.3                               | 0.9                             | <0.1                           | 281                            |
| 11          | Hydrofluoric acid                                        | 7664-39-3    | 43.6%                   | 83,007                 | 96                                | 161                             | 0.3                            | 1,513                          |
| 12          | Olefin                                                   | Proprietary  | 43.1%                   | --                     | --                                | --                              | --                             | --                             |
| 13          | Erythorbic acid                                          | 89-65-6      | 42.9%                   | 8,684                  | 13                                | 17                              | 0.9                            | 110                            |
| 14          | Fatty acids                                              | Proprietary  | 42.9%                   | --                     | --                                | --                              | --                             | --                             |
| 15          | Citrus terpenes                                          | 94266-47-4   | 41.6%                   | 43,907                 | 57                                | 89                              | 4.8                            | 814                            |
| 16          | Hydrocarbons, terpene processing by-products             | 68956-56-9   | 40.7%                   | 29,524                 | 40                                | 61                              | 3.4                            | 581                            |
| 17          | Potassium chloride                                       | 7447-40-7    | 40.2%                   | 28,907,629             | 7,035                             | 60,603                          | <0.1                           | 1,136,781                      |
| 18          | Crystalline silica quartz                                | 14808-60-7   | 40.1%                   | 3,917,132              | 7,165                             | 8,229                           | 6.5                            | 65,385                         |
| 19          | Thiourea, polymer with formaldehyde and 1-phenylethanone | 68527-49-1   | 39.3%                   | 6,154                  | 10                                | 13                              | 0.7                            | 52                             |
| 20          | Solvent naphtha, petroleum, heavy arom.                  | 64742-94-5   | 39.0%                   | 12,332                 | 1.8                               | 27                              | 0.2                            | 2,807                          |
| 21          | Hydrotreated light petroleum distillate                  | 64742-47-8   | 32.9%                   | 74,469                 | 17                                | 191                             | 0.9                            | 38,400                         |
| 22          | Xylenes                                                  | 1330-20-7    | 32.0%                   | 80,029                 | 1.5                               | 211                             | <0.1                           | 11,510                         |
| 23          | Ethylbenzene                                             | 100-41-4     | 31.3%                   | 14,971                 | 2.9                               | 40                              | 0.4                            | 2,579                          |
| 24          | Aromatic hydrocarbon (1)                                 | Proprietary  | 30.6%                   | --                     | --                                | --                              | --                             | --                             |
| 25          | Aromatic hydrocarbon (2)                                 | Proprietary  | 30.6%                   | --                     | --                                | --                              | --                             | --                             |
| 26          | Oxyalkylated alkylphenol                                 | Proprietary  | 30.2%                   | --                     | --                                | --                              | --                             | --                             |

| Rank | Constituent                                     | CASRN       | Freq. of use (%) | Total mass (kg) | Median mass per event (kg) | Mean mass per event (kg) | Min mass per event (kg) | Max mass per event (kg) |
|------|-------------------------------------------------|-------------|------------------|-----------------|----------------------------|--------------------------|-------------------------|-------------------------|
| 27   | Oxyalkylated amine quat                         | Proprietary | 30.2%            | --              | --                         | --                       | --                      | --                      |
| 28   | Isopropylbenzene                                | 98-82-8     | 29.5%            | 126             | 0.3                        | 0.4                      | <0.1                    | 5.7                     |
| 29   | Oxyalkylated alkylphenolic resin                | Proprietary | 27.9%            | --              | --                         | --                       | --                      | --                      |
| 30   | Inorganic compound                              | Proprietary | 27.8%            | --              | --                         | --                       | --                      | --                      |
| 31   | Crosslinked polyol ester                        | Proprietary | 27.6%            | --              | --                         | --                       | --                      | --                      |
| 32   | Polyglycol ester                                | Proprietary | 27.6%            | --              | --                         | --                       | --                      | --                      |
| 33   | Aromatic hydrocarbon (3A)                       | Proprietary | 27.5%            | --              | --                         | --                       | --                      | --                      |
| 34   | Aromatic hydrocarbon (3B)                       | Proprietary | 27.5%            | --              | --                         | --                       | --                      | --                      |
| 35   | Aromatic hydrocarbon (3C)                       | Proprietary | 27.5%            | --              | --                         | --                       | --                      | --                      |
| 36   | Diol compound                                   | Proprietary | 27.5%            | --              | --                         | --                       | --                      | --                      |
| 37   | 2-Butoxyethanol (ethylene glycol butyl ether)   | 111-76-2    | 26.5%            | 46,834          | 55                         | 149                      | <0.1                    | 3,453                   |
| 38   | Xanthan gum                                     | 11138-66-2  | 24.9%            | 123,975         | 346                        | 419                      | <0.1                    | 3,059                   |
| 39   | Portland cement                                 | 65997-15-1  | 24.9%            | 7,427,597       | 22,481                     | 25,178                   | 93                      | 106,584                 |
| 40   | Bentonite                                       | 1302-78-9   | 24.8%            | 708,757         | 570                        | 2,427                    | 7.3                     | 217,271                 |
| 41   | Calcium oxide                                   | 1305-78-8   | 24.4%            | 440,651         | 1,433                      | 1,520                    | 5.2                     | 7,413                   |
| 42   | Gypsum                                          | 13397-24-5  | 24.3%            | 310,276,445     | 2,771                      | 1,073,621                | 9.1                     | 309,126,252             |
| 43   | Magnesium oxide                                 | 1309-48-4   | 24.3%            | 445,681         | 1,474                      | 1,542                    | 2.1                     | 7,230                   |
| 44   | Barium sulfate                                  | 7727-43-7   | 23.9%            | 7,639,223       | 20,544                     | 26,899                   | 14                      | 540,586                 |
| 45   | Disodium metasilicate                           | 6834-92-0   | 23.4%            | 93,416          | 367                        | 336                      | 0.4                     | 10,135                  |
| 46   | Sulfonate                                       | Proprietary | 23.2%            | 500,337         | 1,746                      | 1,939                    | 68                      | 10,047                  |
| 47   | Glutaraldehyde                                  | 111-30-8    | 23.1%            | 39,856          | 75                         | 146                      | <0.1                    | 1,374                   |
| 48   | Sodium bicarbonate                              | 144-55-8    | 23.1%            | 121,572         | 340                        | 449                      | 1.5                     | 2,245                   |
| 49   | Glyoxal                                         | 107-22-2    | 23.0%            | 2,309           | 3.6                        | 8.5                      | <0.1                    | 1,178                   |
| 50   | Cellulose, carboxymethyl ether, sodium salt     | 9004-32-4   | 22.7%            | 287,308         | 953                        | 1,068                    | 23                      | 6,622                   |
| 51   | Acetic acid ethenyl ester, polymer with ethenol | 25213-24-5  | 22.5%            | 19,905          | 55                         | 75                       | <0.1                    | 482                     |
| 52   | Inorganic potassium compound/alkali hydroxide   | Proprietary | 22.5%            | --              | --                         | --                       | --                      | --                      |
| 53   | Non-hazardous ingredients                       | Proprietary | 22.2%            | --              | --                         | --                       | --                      | --                      |
| 54   | Mixture                                         | Proprietary | 22.1%            | --              | --                         | --                       | --                      | --                      |
| 55   | Limestone                                       | 1317-65-3   | 22.0%            | 448,313         | 1,456                      | 1,718                    | 6.2                     | 11,113                  |

| Rank | Constituent                                                | CASRN       | Freq. of use (%) | Total mass (kg) | Median mass per event (kg) | Mean mass per event (kg) | Min mass per event (kg) | Max mass per event (kg) |
|------|------------------------------------------------------------|-------------|------------------|-----------------|----------------------------|--------------------------|-------------------------|-------------------------|
| 56   | Calcium carbonate                                          | 471-34-1    | 21.7%            | 2,719,556       | 9,319                      | 10,541                   | 0.6                     | 147,567                 |
| 57   | Calcium chloride                                           | 10043-52-4  | 21.7%            | 7,194,553       | 115                        | 27,994                   | 0.7                     | 121,864                 |
| 58   | Silica                                                     | 7631-86-9   | 21.6%            | 843,816         | 2,098                      | 3,296                    | <0.1                    | 132,998                 |
| 59   | Aluminum oxide                                             | 1344-28-1   | 21.5%            | 235,968         | 624                        | 925                      | <0.1                    | 13,737                  |
| 60   | Iron oxide                                                 | 1309-37-1   | 21.2%            | 43,396          | 102                        | 172                      | <0.1                    | 2,645                   |
| 61   | Mica                                                       | 12001-26-2  | 21.2%            | 379,061         | 1,174                      | 1,504                    | 1.2                     | 37,265                  |
| 62   | Wood chemicals                                             | Proprietary | 21.0%            | --              | --                         | --                       | --                      | --                      |
| 63   | Sulfur compound                                            | Proprietary | 20.8%            | --              | --                         | --                       | --                      | --                      |
| 64   | Salt compound                                              | Proprietary | 20.7%            | --              | --                         | --                       | --                      | --                      |
| 65   | Naphthalene sulfonate-formaldehyde condensate, sodium salt | Proprietary | 20.3%            | --              | --                         | --                       | --                      | --                      |
| 66   | Salt of organic acid                                       | Proprietary | 20.2%            | --              | --                         | --                       | --                      | --                      |
| 67   | Carbon                                                     | 7440-44-0   | 19.8%            | 35,749          | 107                        | 152                      | 0.1                     | 2,643                   |
| 68   | Aliphatic alcohol                                          | Proprietary | 19.7%            | --              | --                         | --                       | --                      | --                      |
| 69   | Fatty acids ester                                          | Proprietary | 19.2%            | --              | --                         | --                       | --                      | --                      |
| 70   | Sodium carbonate                                           | 497-19-8    | 19.1%            | 94,121          | 227                        | 415                      | <0.1                    | 2,699                   |
| 71   | Modified sulfonate                                         | Proprietary | 19.0%            | --              | --                         | --                       | --                      | --                      |
| 72   | Fumes, silica                                              | 69012-64-2  | 18.9%            | 186,990         | 570                        | 835                      | 6.5                     | 4,325                   |
| 73   | Quinoline                                                  | 91-22-5     | 18.8%            | 22              | 0.1                        | 0.1                      | <0.1                    | 1.9                     |
| 74   | Trydymite                                                  | 15468-32-3  | 18.1%            | 4,437           | 7.1                        | 21                       | 1.5                     | 230                     |
| 75   | Saponite                                                   | 1319-41-1   | 17.9%            | 835,598         | 2,722                      | 3,923                    | 90.7                    | 63,299                  |
| 76   | Aromatic hydrocarbon A (7A)                                | Proprietary | 17.1%            | --              | --                         | --                       | --                      | --                      |
| 77   | Aromatic hydrocarbon A (7B)                                | Proprietary | 17.1%            | --              | --                         | --                       | --                      | --                      |
| 78   | Aromatic hydrocarbon A (7C)                                | Proprietary | 17.1%            | --              | --                         | --                       | --                      | --                      |
| 79   | Sodium polyacrylate                                        | Proprietary | 16.8%            | 318,807         | 1,384                      | 1,602                    | 181                     | 11,181                  |
| 80   | Aluminum                                                   | 7429-90-5   | 16.5%            | 2,212           | 9.1                        | 11                       | 1.8                     | 53                      |
| 81   | Acrylic polymer                                            | 203008-81-5 | 16.3%            | 17,095          | 79                         | 88                       | 20                      | 603                     |
| 82   | Acetone                                                    | 67-64-1     | 15.5%            | 26              | 0.1                        | 0.1                      | <0.1                    | 3.6                     |
| 83   | Welan gum                                                  | 72121-88-1  | 15.3%            | 920             | 4.1                        | 5.1                      | 1.4                     | 43                      |
| 84   | Detergent                                                  | Proprietary | 14.3%            | --              | --                         | --                       | --                      | --                      |
| 85   | Polysaccharide                                             | Proprietary | 14.3%            | --              | --                         | --                       | --                      | --                      |
| 86   | Petroleum resins                                           | 64742-16-1  | 14.2%            | 281             | 1.3                        | 1.7                      | 0.3                     | 8.0                     |

| Rank | Constituent                                                                                                                         | CASRN       | Freq. of use (%) | Total mass (kg) | Median mass per event (kg) | Mean mass per event (kg) | Min mass per event (kg) | Max mass per event (kg) |
|------|-------------------------------------------------------------------------------------------------------------------------------------|-------------|------------------|-----------------|----------------------------|--------------------------|-------------------------|-------------------------|
| 87   | Calcium bromide                                                                                                                     | 7789-41-5   | 13.7%            | 774             | 0.7                        | 4.7                      | 0.2                     | 610                     |
| 88   | Poly(oxy-1,2-ethandiyl), a-(nonylphenyl)-w-hydroxy-                                                                                 | 9016-45-9   | 13.2%            | 965             | 4.6                        | 6.1                      | 0.2                     | 35                      |
| 89   | Cellulose, microcrystalline                                                                                                         | 9004-34-6   | 13.1%            | 120,351         | 431                        | 777                      | 0.1                     | 17,760                  |
| 90   | Copolymer                                                                                                                           | Proprietary | 13.1%            | --              | --                         | --                       | --                      | --                      |
| 91   | Lubricant                                                                                                                           | Proprietary | 12.8%            | --              | --                         | --                       | --                      | --                      |
| 92   | Stearic acid                                                                                                                        | 57-11-4     | 12.1%            | 22,416          | 150                        | 156                      | 1.2                     | 487                     |
| 93   | 1,2-Ethanediaminium, N1,N2-bis[2-[bis(2-hydroxyethyl)methylammonio]ethyl]-N1,N2-bis(2-hydroxyethyl)-N1,N2-dimethyl-, chloride (1:4) | 138879-94-4 | 11.5%            | 16,052          | 96                         | 118                      | 13                      | 959                     |
| 94   | Sodium lignosulfate                                                                                                                 | 8061-51-6   | 11.4%            | 1,440           | 10                         | 11                       | <0.1                    | 29                      |
| 95   | Sodium gluconate                                                                                                                    | 527-07-1    | 11.1%            | 1,518           | 10                         | 12                       | 1.1                     | 79                      |
| 96   | Aromatic hydrocarbon (7A)                                                                                                           | Proprietary | 10.4%            | --              | --                         | --                       | --                      | --                      |
| 97   | Aromatic hydrocarbon (7B)                                                                                                           | Proprietary | 10.4%            | --              | --                         | --                       | --                      | --                      |
| 98   | Ester                                                                                                                               | Proprietary | 10.2%            | --              | --                         | --                       | --                      | --                      |
| 99   | Polymer                                                                                                                             | Proprietary | 10.2%            | 20,676          | 103                        | 225                      | 15                      | 3,492                   |
| 100  | Pine oil                                                                                                                            | 8002-09-3   | 9.8%             | 607             | 4.5                        | 5.2                      | <0.1                    | 19                      |
| 101  | Aromatic amines                                                                                                                     | Proprietary | 9.6%             | 15              | 15                         | 15                       | 15                      | 15                      |
| 102  | Ethyloctynol                                                                                                                        | 5877-42-9   | 9.6%             | 640             | 4.5                        | 5.6                      | <0.1                    | 51                      |
| 103  | Isoquinoline                                                                                                                        | 119-65-3    | 9.6%             | 592             | 4.5                        | 5.2                      | <0.1                    | 19                      |
| 104  | Nonylphenol ethoxylate                                                                                                              | Proprietary | 9.6%             | 5.1             | 5.1                        | 5.1                      | 5.1                     | 5.1                     |
| 105  | Quinaldine                                                                                                                          | 91-63-4     | 9.5%             | 593             | 4.5                        | 5.2                      | <0.1                    | 19                      |
| 106  | Aromatic amine, TOFA salt                                                                                                           | Proprietary | 8.9%             | 9.1             | 9.1                        | 9.1                      | 9.1                     | 9.1                     |
| 107  | Viscosifier                                                                                                                         | Proprietary | 8.9%             | --              | --                         | --                       | --                      | --                      |
| 108  | Inorganic solvent                                                                                                                   | Proprietary | 8.2%             | --              | --                         | --                       | --                      | --                      |
| 109  | P-mentha-1,8-diene                                                                                                                  | 138-86-3    | 8.2%             | 19,230          | 179                        | 198                      | 1.0                     | 691                     |
| 110  | Modified starch                                                                                                                     | Proprietary | 7.9%             | --              | --                         | --                       | --                      | --                      |
| 111  | Magnesium                                                                                                                           | 7439-95-4   | 7.5%             | 471,029         | 4,941                      | 5,293                    | 489                     | 82,343                  |
| 112  | Acetic acid                                                                                                                         | 64-19-7     | 7.4%             | 45,407          | 286                        | 516                      | 1.1                     | 7,028                   |
| 113  | Organophosphonic acid salt                                                                                                          | Proprietary | 7.4%             | --              | --                         | --                       | --                      | --                      |
| 114  | Aldehyde                                                                                                                            | Proprietary | 7.3%             | --              | --                         | --                       | --                      | --                      |
| 115  | Amide surfactant                                                                                                                    | Proprietary | 7.2%             | --              | --                         | --                       | --                      | --                      |

| <b>Rank</b> | <b>Constituent</b>                                                    | <b>CASRN</b> | <b>Freq. of use (%)</b> | <b>Total mass (kg)</b> | <b>Median mass per event (kg)</b> | <b>Mean mass per event (kg)</b> | <b>Min mass per event (kg)</b> | <b>Max mass per event (kg)</b> |
|-------------|-----------------------------------------------------------------------|--------------|-------------------------|------------------------|-----------------------------------|---------------------------------|--------------------------------|--------------------------------|
| 116         | Amide surfactant phosphate acid salt                                  | Proprietary  | 6.6%                    | --                     | --                                | --                              | --                             | --                             |
| 117         | Amide surfactant phosphate ester salt                                 | Proprietary  | 6.5%                    | --                     | --                                | --                              | --                             | --                             |
| 118         | Anionic acrylamide copolymer                                          | Proprietary  | 5.9%                    | 100,992                | 1,452                             | 1,554                           | 476                            | 4,173                          |
| 119         | Solvent naphtha, petroleum, light arom.                               | 64742-95-6   | 5.8%                    | 2,655                  | 1.7                               | 39                              | 0.7                            | 2,274                          |
| 120         | 1,2,4-Trimethylbenzene                                                | 95-63-6      | 5.7%                    | 1,231                  | 1.6                               | 18                              | 0.7                            | 819                            |
| 121         | Isopropanol                                                           | 67-63-0      | 5.7%                    | 797                    | 5.3                               | 12                              | <0.1                           | 196                            |
| 122         | Tetrasodium pyrophosphate                                             | 7758-16-9    | 5.7%                    | 7,764                  | 68                                | 114                             | <0.1                           | 1,202                          |
| 123         | Cellophane                                                            | 9005-81-6    | 5.6%                    | 8,030                  | 59                                | 120                             | 0.1                            | 2,225                          |
| 124         | Cellulose, 2-hydroxyethyl ether                                       | 9004-62-0    | 5.5%                    | 6,686                  | 63                                | 103                             | 8.6                            | 1,526                          |
| 125         | Cristobalite                                                          | 14464-46-1   | 5.1%                    | 28,771                 | 289                               | 472                             | 61                             | 6,495                          |
| 126         | Halides, inorganic salt                                               | Proprietary  | 5.1%                    | --                     | --                                | --                              | --                             | --                             |
| 127         | Modified thiourea polymer                                             | Proprietary  | 5.1%                    | --                     | --                                | --                              | --                             | --                             |
| 128         | Calcium magnesium oxide                                               | 37247-91-9   | 5.0%                    | 13,246                 | 100                               | 225                             | 16                             | 6,761                          |
| 129         | Ionic surfactants                                                     | Proprietary  | 4.1%                    | --                     | --                                | --                              | --                             | --                             |
| 130         | 2-Propenoic acid, homopolymer, sodium salt                            | 9003-04-7    | 4.0%                    | 13,909                 | 133                               | 296                             | <0.1                           | 1,945                          |
| 131         | Formaldehyde, polymer with 2-methyloxirane, 4-nonylphenol and oxirane | 63428-92-2   | 3.6%                    | 295                    | 1.7                               | 6.9                             | 1.6                            | 66                             |
| 132         | Ionic surfactant                                                      | Proprietary  | 3.6%                    | --                     | --                                | --                              | --                             | --                             |
| 133         | Calcium hydroxide                                                     | 1305-62-0    | 3.5%                    | 42,250                 | 136                               | 1,031                           | 2.5                            | 12,156                         |
| 134         | Proprietary blend                                                     | Proprietary  | 3.4%                    | --                     | --                                | --                              | --                             | --                             |
| 135         | Naphthalene sulfonate-formaldehyde condensate, sodium salt            | 9084-06-4    | 3.0%                    | 411                    | 9.0                               | 11                              | 2.7                            | 33                             |
| 136         | Polynuclear aromatic hydrocarbons                                     | Proprietary  | 3.0%                    | --                     | --                                | --                              | --                             | --                             |
| 137         | Organo sulfur compounds                                               | Proprietary  | 2.9%                    | --                     | --                                | --                              | --                             | --                             |
| 138         | Phosphoric acid                                                       | 7664-38-2    | 2.9%                    | 4,504                  | 82                                | 129                             | 0.4                            | 879                            |
| 139         | Tetrasodium pyrophosphate                                             | 7722-88-5    | 2.9%                    | 7,080                  | 159                               | 202                             | 64                             | 431                            |
| 140         | Aromatic hydrocarbon (7)                                              | Proprietary  | 2.9%                    | --                     | --                                | --                              | --                             | --                             |
| 141         | Nitrilotriacetic acid                                                 | 139-13-9     | 2.9%                    | 6,252                  | 83                                | 184                             | 8.6                            | 649                            |

| <b>Rank</b> | <b>Constituent</b>                         | <b>CASRN</b> | <b>Freq. of use (%)</b> | <b>Total mass (kg)</b> | <b>Median mass per event (kg)</b> | <b>Mean mass per event (kg)</b> | <b>Min mass per event (kg)</b> | <b>Max mass per event (kg)</b> |
|-------------|--------------------------------------------|--------------|-------------------------|------------------------|-----------------------------------|---------------------------------|--------------------------------|--------------------------------|
| 142         | Ethanol                                    | 64-17-5      | 2.8%                    | 298                    | 8.6                               | 9.0                             | 1.2                            | 29                             |
| 143         | Silanetriol, (3-aminopropyl)-, homopolymer | 68400-07-7   | 2.7%                    | 1,729                  | 51                                | 54                              | 7.2                            | 176                            |
| 144         | Silanetriol, 1-(3-aminopropyl)-            | 58160-99-9   | 2.7%                    | 288                    | 8.6                               | 9.0                             | 1.2                            | 29                             |
| 145         | Aromatic compound                          | Proprietary  | 2.5%                    | --                     | --                                | --                              | --                             | --                             |
| 146         | Ethylene glycol                            | 107-21-1     | 2.5%                    | 81                     | 0.5                               | 2.7                             | <0.1                           | 31                             |
| 147         | Ferrous sulfate                            | 17375-41-6   | 2.4%                    | 173                    | 2.8                               | 6.0                             | 0.2                            | 45                             |
| 148         | Polycyclic compound                        | Proprietary  | 2.4%                    | --                     | --                                | --                              | --                             | --                             |
| 149         | Polypropylene glycol                       | 25322-69-4   | 2.3%                    | 32                     | 0.1                               | 1.2                             | <0.1                           | 4.0                            |
| 150         | Sulfuric acid                              | 7664-93-9    | 2.1%                    | 6.2                    | <0.1                              | 0.2                             | <0.1                           | 1.7                            |
| 151         | 2-Ethylhexan-1-ol                          | 104-76-7     | 2.0%                    | 2,205                  | 16                                | 92                              | 0.9                            | 480                            |
| 152         | Bis(isopropyl)naphthalene                  | 38640-62-9   | 2.0%                    | 83                     | 1.8                               | 3.5                             | 1.5                            | 26                             |
| 153         | Calcium sulfate                            | 7778-18-9    | 2.0%                    | 419                    | 13                                | 18                              | 0.1                            | 48                             |
| 154         | Ashes (residues), coal                     | 68131-74-8   | 1.9%                    | 127,226                | 4,112                             | 5,532                           | 1,007                          | 23,689                         |
| 155         | Isobutylmethylcarbinol                     | 108-11-2     | 1.9%                    | 57                     | 1.8                               | 2.5                             | 1.5                            | 12                             |
| 156         | Boric acid                                 | 10043-35-3   | 1.9%                    | 31                     | 0.9                               | 1.4                             | <0.1                           | 4.0                            |
| 157         | Glassy calcium magnesium phosphate         | 65997-17-3   | 1.9%                    | 51,860                 | 2,138                             | 2,357                           | 490                            | 4,658                          |
| 158         | Petroleum resins                           | Proprietary  | 1.9%                    | --                     | --                                | --                              | --                             | --                             |
| 159         | Mineral fiber                              | Proprietary  | 1.8%                    | 11,097                 | 467                               | 528                             | 23                             | 1,728                          |
| 160         | Mullite                                    | 1302-93-8    | 1.8%                    | 14,867                 | 641                               | 708                             | 147                            | 1,398                          |
| 161         | Polyester                                  | Proprietary  | 1.8%                    | 56                     | 3.2                               | 3.1                             | 2.6                            | 3                              |
| 162         | Siloxanes and silicones, di-Me             | 67762-90-7   | 1.7%                    | 79                     | <0.1                              | 4.0                             | <0.1                           | 79                             |
| 163         | Vegetable and polymer fibers               | Proprietary  | 1.7%                    | 563                    | 563                               | 563                             | 563                            | 563                            |
| 164         | Gilsonite                                  | 12002-43-6   | 1.6%                    | 10657                  | 363                               | 561                             | 22                             | 2,654                          |
| 165         | Humic acid                                 | 1415-93-6    | 1.6%                    | 10,171                 | 516                               | 535                             | 90                             | 1,168                          |
| 166         | Polysiloxanes, di-Me                       | 63148-62-9   | 1.6%                    | 0.1                    | <0.1                              | <0.1                            | <0.1                           | <0.1                           |
| 167         | Quaternary ammonium compound               | Proprietary  | 1.5%                    | --                     | --                                | --                              | --                             | --                             |
| 168         | Quaternary ammonium compound (1)           | Proprietary  | 1.5%                    | --                     | --                                | --                              | --                             | --                             |
| 169         | Quaternary ammonium compound (2)           | Proprietary  | 1.5%                    | --                     | --                                | --                              | --                             | --                             |
| 170         | Quaternary ammonium compound (3)           | Proprietary  | 1.5%                    | --                     | --                                | --                              | --                             | --                             |

| <b>Rank</b> | <b>Constituent</b>                                                                | <b>CASRN</b> | <b>Freq. of use (%)</b> | <b>Total mass (kg)</b> | <b>Median mass per event (kg)</b> | <b>Mean mass per event (kg)</b> | <b>Min mass per event (kg)</b> | <b>Max mass per event (kg)</b> |
|-------------|-----------------------------------------------------------------------------------|--------------|-------------------------|------------------------|-----------------------------------|---------------------------------|--------------------------------|--------------------------------|
| 171         | Dodecylbenzene sulfonic acid                                                      | 27176-87-0   | 1.4%                    | 95                     | <0.1                              | 5.6                             | <0.1                           | 94                             |
| 172         | Propylene glycol                                                                  | 57-55-6      | 1.4%                    | 180                    | <0.1                              | 11                              | <0.1                           | 180                            |
| 173         | Quaternary ammonium compound-1                                                    | Proprietary  | 1.4%                    | --                     | --                                | --                              | --                             | --                             |
| 174         | Quaternary ammonium compound-2                                                    | Proprietary  | 1.4%                    | --                     | --                                | --                              | --                             | --                             |
| 175         | Quaternary ammonium compound-3                                                    | Proprietary  | 1.4%                    | --                     | --                                | --                              | --                             | --                             |
| 176         | Surfactant                                                                        | Proprietary  | 1.4%                    | --                     | --                                | --                              | --                             | --                             |
| 177         | Toluene                                                                           | 108-88-3     | 1.4%                    | 1,934                  | 6.7                               | 114                             | 0.3                            | 660                            |
| 178         | Fatty acids, tall oil, reaction products with triethanolamine                     | 67784-78-5   | 1.3%                    | 0.2                    | <0.1                              | <0.1                            | <0.1                           | <0.1                           |
| 179         | Fuller's earth                                                                    | 8031-18-3    | 1.3%                    | 0.9                    | 0.1                               | 0.1                             | <0.1                           | 0.1                            |
| 180         | Poly(oxy-1,2-ethanediyl), .alpha.-[bis(1-methylpropyl)phenyl]-.omega.-hydroxy-    | 53964-94-6   | 1.3%                    | 0.4                    | <0.1                              | <0.1                            | <0.1                           | 0.1                            |
| 181         | Polyethylene glycol monostearate                                                  | 9004-99-3    | 1.3%                    | <0.1                   | <0.1                              | <0.1                            | <0.1                           | <0.1                           |
| 182         | Potassium acetate                                                                 | 127-08-2     | 1.3%                    | <0.1                   | <0.1                              | <0.1                            | <0.1                           | <0.1                           |
| 183         | Sorbic acid                                                                       | 110-44-1     | 1.3%                    | <0.1                   | <0.1                              | <0.1                            | <0.1                           | <0.1                           |
| 184         | Sorbitan monostearate                                                             | 1338-41-6    | 1.3%                    | <0.1                   | <0.1                              | <0.1                            | <0.1                           | <0.1                           |
| 185         | Sulfuric acid, calcium salt, hydrate (2:2:1)                                      | 10034-76-1   | 1.3%                    | 1,588                  | 55                                | 99                              | 44                             | 407                            |
| 186         | Urea                                                                              | 57-13-6      | 1.3%                    | 4,677                  | 31                                | 292                             | 0.1                            | 2,404                          |
| 187         | Ethoxylated C14-15 alcohols                                                       | 68951-67-7   | 1.3%                    | 76                     | 2.4                               | 5.1                             | 0.7                            | 29.                            |
| 188         | Naphthalene sulfonic acid, bis(1-methylethyl)-, compd. with cyclohexanamine (1:1) | Proprietary  | 1.3%                    | --                     | --                                | --                              | --                             | --                             |
| 189         | Benzenesulfonic acid, C10-16-alkyl derivs., compds. with cyclohexylamine          | Proprietary  | 1.2%                    | --                     | --                                | --                              | --                             | --                             |
| 190         | Ethoxylated alcohol                                                               | Proprietary  | 1.2%                    | --                     | --                                | --                              | --                             | --                             |
| 191         | Etidronic acid                                                                    | 2809-21-4    | 1.2%                    | 8,001                  | 543                               | 572                             | 240                            | 1350                           |
| 192         | Methyl ester of sulfonate tannin                                                  | Proprietary  | 1.2%                    | 795                    | 50                                | 72                              | 13                             | 274                            |

| <b>Rank</b> | <b>Constituent</b>                                                                                           | <b>CASRN</b> | <b>Freq. of use (%)</b> | <b>Total mass (kg)</b> | <b>Median mass per event (kg)</b> | <b>Mean mass per event (kg)</b> | <b>Min mass per event (kg)</b> | <b>Max mass per event (kg)</b> |
|-------------|--------------------------------------------------------------------------------------------------------------|--------------|-------------------------|------------------------|-----------------------------------|---------------------------------|--------------------------------|--------------------------------|
| 193         | Nonionic surfactants                                                                                         | Proprietary  | 1.2%                    | --                     | --                                | --                              | --                             | --                             |
| 194         | Phosphonic acid                                                                                              | 13598-36-2   | 1.2%                    | 2,400                  | 163                               | 171                             | 72                             | 405                            |
| 195         | Polyacrylate / polyacrylamide polymer blend                                                                  | Proprietary  | 1.2%                    | 113                    | 7.3                               | 8.7                             | 0.9                            | 30                             |
| 196         | Tricalcium phosphate                                                                                         | 7758-87-4    | 1.2%                    | 37                     | 0.5                               | 2.7                             | <0.1                           | 30                             |
| 197         | Blend                                                                                                        | Proprietary  | 1.1%                    | --                     | --                                | --                              | --                             | --                             |
| 198         | Non-hazardous                                                                                                | Proprietary  | 1.1%                    | --                     | --                                | --                              | --                             | --                             |
| 199         | Polypropylene                                                                                                | 9003-07-0    | 1.1%                    | 696                    | 56                                | 54                              | 11                             | 81                             |
| 200         | 2-Propenoic acid, 2-methyl-, polymer with 2-propenoic acid                                                   | 25751-21-7   | 1.0%                    | 7.0                    | 0.7                               | 0.6                             | <0.1                           | 0.8                            |
| 201         | Ethylene oxide                                                                                               | 75-21-8      | 1.0%                    | 0.5                    | <0.1                              | <0.1                            | <0.1                           | 0.5                            |
| 202         | Formic acid                                                                                                  | 64-18-6      | 1.0%                    | 2,497                  | 40                                | 208                             | 12                             | 1,159                          |
| 203         | Lignosulfonate                                                                                               | Proprietary  | 1.0%                    | --                     | --                                | --                              | --                             | --                             |
| 204         | Alkylaryl sulfonate                                                                                          | Proprietary  | 0.9%                    | --                     | --                                | --                              | --                             | --                             |
| 205         | Benzene, C10-C16 alkyl derivatives                                                                           | 68648-87-3   | 0.9%                    | 0.7                    | <0.1                              | 0.1                             | <0.1                           | 0.2                            |
| 206         | Boron sodium oxide                                                                                           | 1330-43-4    | 0.9%                    | 1,074                  | 98                                | 98                              | 98                             | 98                             |
| 207         | Diutan                                                                                                       | 125005-87-0  | 0.9%                    | 0.2                    | <0.1                              | <0.1                            | <0.1                           | <0.1                           |
| 208         | Mineral                                                                                                      | Proprietary  | 0.9%                    | --                     | --                                | --                              | --                             | --                             |
| 209         | Olefins                                                                                                      | Proprietary  | 0.9%                    | --                     | --                                | --                              | --                             | --                             |
| 210         | Oxylated alcohol                                                                                             | Proprietary  | 0.9%                    | --                     | --                                | --                              | --                             | --                             |
| 211         | Polyvinyl alcohol                                                                                            | 9002-89-5    | 0.9%                    | 618                    | 55                                | 56                              | 35                             | 80                             |
| 212         | Potassium oxide                                                                                              | 12136-45-7   | 0.9%                    | 1,241                  | 85                                | 113                             | 59                             | 250                            |
| 213         | Quaternary ammonium compound                                                                                 | 61790-59-8   | 0.9%                    | 3.2                    | <0.1                              | 0.3                             | <0.1                           | 3.2                            |
| 214         | Sodium formate                                                                                               | 141-53-7     | 0.9%                    | 68                     | 5.6                               | 6.2                             | 0.2                            | 23                             |
| 215         | 1-Propanesulfonic acid, 2-methyl-2-[(1-oxo-2-propenyl)amino]-, monoammonium salt, polymer with 2-propenamide | 110897-64-8  | 0.8%                    | 1.5                    | 0.1                               | 0.1                             | 0.1                            | 0.2                            |
| 216         | Acrylamide                                                                                                   | 79-06-1      | 0.8%                    | <0.1                   | <0.1                              | <0.1                            | <0.1                           | <0.1                           |
| 217         | Amphoteric surfactant                                                                                        | Proprietary  | 0.8%                    | --                     | --                                | --                              | --                             | --                             |
| 218         | Aromatic hydrocarbon (3)                                                                                     | Proprietary  | 0.8%                    | --                     | --                                | --                              | --                             | --                             |



| Rank | Constituent                                                                                      | CASRN       | Freq. of use (%) | Total mass (kg) | Median mass per event (kg) | Mean mass per event (kg) | Min mass per event (kg) | Max mass per event (kg) |
|------|--------------------------------------------------------------------------------------------------|-------------|------------------|-----------------|----------------------------|--------------------------|-------------------------|-------------------------|
| 219  | Fatty acids, tall oil                                                                            | Proprietary | 0.8%             | --              | --                         | --                       | --                      | --                      |
| 220  | Oxide support                                                                                    | Proprietary | 0.8%             | --              | --                         | --                       | --                      | --                      |
| 221  | Polyacrylamide                                                                                   | 9003-05-8   | 0.8%             | 241             | 25                         | 24                       | <0.1                    | 48                      |
| 222  | Proprietary                                                                                      | Proprietary | 0.8%             | 262             | 30                         | 33                       | 16                      | 52                      |
| 223  | Salt of fatty acid polyamine                                                                     | Proprietary | 0.8%             | --              | --                         | --                       | --                      | --                      |
| 224  | Silica support                                                                                   | Proprietary | 0.8%             | --              | --                         | --                       | --                      | --                      |
| 225  | Sodium aluminate                                                                                 | 1302-42-7   | 0.8%             | 809             | 47                         | 81                       | 9.1                     | 255                     |
| 226  | Sulfonic acid salt                                                                               | Proprietary | 0.8%             | --              | --                         | --                       | --                      | --                      |
| 227  | Tall oil                                                                                         | 8002-26-4   | 0.8%             | 3,912           | 13                         | 391                      | 0.7                     | 3,538                   |
| 228  | Aromatic hydrocarbon (4)                                                                         | Proprietary | 0.8%             | --              | --                         | --                       | --                      | --                      |
| 229  | Ethoxylated nonylphenol                                                                          | Proprietary | 0.8%             | --              | --                         | --                       | --                      | --                      |
| 230  | Organophilic clay                                                                                | Proprietary | 0.8%             | --              | --                         | --                       | --                      | --                      |
| 231  | Polyether                                                                                        | Proprietary | 0.8%             | 184             | 14                         | 20                       | 1.1                     | 60                      |
| 232  | Sodium acetate                                                                                   | 127-09-3    | 0.8%             | 11              | 1.0                        | 1.5                      | 0.1                     | 5.1                     |
| 233  | Sodium sulfate                                                                                   | 7757-82-6   | 0.8%             | 291             | 2.4                        | 32                       | <0.1                    | 191                     |
| 234  | Synthetic acid                                                                                   | Proprietary | 0.8%             | --              | --                         | --                       | --                      | --                      |
| 235  | 2-Mercaptoethyl alcohol                                                                          | 60-24-2     | 0.7%             | 27              | 2.5                        | 3.4                      | 1.2                     | 8.9                     |
| 236  | Alkyl aryl amine sulfonate                                                                       | Proprietary | 0.7%             | --              | --                         | --                       | --                      | --                      |
| 237  | Aromatic aldehyde                                                                                | Proprietary | 0.7%             | --              | --                         | --                       | --                      | --                      |
| 238  | Aromatic hydrocarbon (5)                                                                         | Proprietary | 0.7%             | --              | --                         | --                       | --                      | --                      |
| 239  | Borate                                                                                           | Proprietary | 0.7%             | --              | --                         | --                       | --                      | --                      |
| 240  | Cocamidopropyl betaine                                                                           | 61789-40-0  | 0.7%             | 49              | <0.1                       | 6.2                      | <0.1                    | 49                      |
| 241  | Compound synthetic diesters                                                                      | 8029-39-8   | 0.7%             | 240             | 19                         | 30                       | 9.1                     | 84                      |
| 242  | Cyclic alkanes                                                                                   | Proprietary | 0.7%             | --              | --                         | --                       | --                      | --                      |
| 243  | Cyclohexamine sulfate                                                                            | 19834-02-7  | 0.7%             | 2.0             | 0.1                        | 0.2                      | 0.1                     | 0.9                     |
| 244  | Diethanolamine                                                                                   | 111-42-2    | 0.7%             | 0.1             | <0.1                       | <0.1                     | <0.1                    | <0.1                    |
| 245  | Ketone                                                                                           | Proprietary | 0.7%             | --              | --                         | --                       | --                      | --                      |
| 246  | Linear alkylbenzene                                                                              | Proprietary | 0.7%             | --              | --                         | --                       | --                      | --                      |
| 247  | Oxyalkylated fatty acid                                                                          | Proprietary | 0.7%             | --              | --                         | --                       | --                      | --                      |
| 248  | Poly(oxy-1,2-ethanediyl),<br>.alpha.-isodecyl-.omega.-<br>hydroxy-, phosphate, potassium<br>salt | 68071-17-0  | 0.7%             | 29              | 0.6                        | 3.6                      | 0.3                     | 15                      |
| 249  | Salt of inorganic acid                                                                           | Proprietary | 0.7%             | --              | --                         | --                       | --                      | --                      |

| Rank | Constituent                                                                                                                                                          | CASRN       | Freq. of use (%) | Total mass (kg) | Median mass per event (kg) | Mean mass per event (kg) | Min mass per event (kg) | Max mass per event (kg) |
|------|----------------------------------------------------------------------------------------------------------------------------------------------------------------------|-------------|------------------|-----------------|----------------------------|--------------------------|-------------------------|-------------------------|
| 250  | Sodium oxide                                                                                                                                                         | 12401-86-4  | 0.7%             | 939             | 91                         | 117                      | 59                      | 250                     |
| 251  | Sodium silicate                                                                                                                                                      | 1344-09-8   | 0.7%             | 5,721           | 72                         | 715                      | 34                      | 2,666                   |
| 252  | Strontium chloride                                                                                                                                                   | 10476-85-4  | 0.7%             | 194             | 23                         | 24                       | 2.3                     | 48                      |
| 253  | Unsaturated alcohol                                                                                                                                                  | Proprietary | 0.7%             | --              | --                         | --                       | --                      | --                      |
| 254  | Wood dust, soft wood                                                                                                                                                 | Proprietary | 0.7%             | 1,349           | 68                         | 169                      | 45                      | 674                     |
| 255  | 2-Butenedioic acid (E)-, polymer with 1,2-ethanediol and .alpha.,.alpha.?-[(1-methylethylidene)di-4,1-phenylene]bis[.omega.-hydroxypoly[oxy(methyl-1,2-ethanediyl)]] | 39382-21-3  | 0.6%             | <0.1            | <0.1                       | <0.1                     | <0.1                    | <0.1                    |
| 256  | 4,7-Methano-1H-indene, 3A,4,7,7A-tetrahydro-, polymer with 1,3-cyclopentadiene, cyclopentene, 1-hexene, 2-methyl-2-butene and 1,3-pentadiene                         | 68003-51-0  | 0.6%             | <0.1            | <0.1                       | <0.1                     | <0.1                    | <0.1                    |
| 257  | Alcohols, C10-14, ethoxylated                                                                                                                                        | 66455-15-0  | 0.6%             | 456             | 64                         | 65                       | 28                      | 107                     |
| 258  | Ammonium hydroxide                                                                                                                                                   | 1336-21-6   | 0.6%             | <0.1            | <0.1                       | <0.1                     | <0.1                    | <0.1                    |
| 259  | Cellulose derivative                                                                                                                                                 | Proprietary | 0.6%             | 181             | 91                         | 91                       | 45                      | 136                     |
| 260  | Coal, <5% SiO2                                                                                                                                                       | Proprietary | 0.6%             | 9,081           | 1,057                      | 1,297                    | 420                     | 3,157                   |
| 261  | Esters of rosin oligomers with pentaerythritol                                                                                                                       | 65997-12-8  | 0.6%             | <0.1            | <0.1                       | <0.1                     | <0.1                    | <0.1                    |
| 262  | Ethanesulfonic acid, 2-[methyl[(9Z)-1-oxo-9-octadecen-1-Yl]amino]-, sodium salt (1:1)                                                                                | 137-20-2    | 0.6%             | 4,995           | 53                         | 714                      | 6.1                     | 2,881                   |
| 263  | Morpholine                                                                                                                                                           | 110-91-8    | 0.6%             | 38              | 5.4                        | 5.4                      | 2.4                     | 8.9                     |
| 264  | Mutual solvent                                                                                                                                                       | Proprietary | 0.6%             | --              | --                         | --                       | --                      | --                      |
| 265  | Nonionic surfactant                                                                                                                                                  | Proprietary | 0.6%             | 93              | <0.1                       | 13                       | <0.1                    | 80                      |
| 266  | Organic sulfonic acid amine salt                                                                                                                                     | Proprietary | 0.6%             | --              | --                         | --                       | --                      | --                      |
| 267  | Silicon dioxide crystalline                                                                                                                                          | 60676-86-0  | 0.6%             | 5.3             | 0.7                        | 0.8                      | 0.2                     | 1.2                     |
| 268  | Alkylene oxide block polymer                                                                                                                                         | Proprietary | 0.5%             | --              | --                         | --                       | --                      | --                      |
| 269  | Biopolymer                                                                                                                                                           | Proprietary | 0.5%             | --              | --                         | --                       | --                      | --                      |

| <b>Rank</b> | <b>Constituent</b>                                                                               | <b>CASRN</b> | <b>Freq. of use (%)</b> | <b>Total mass (kg)</b> | <b>Median mass per event (kg)</b> | <b>Mean mass per event (kg)</b> | <b>Min mass per event (kg)</b> | <b>Max mass per event (kg)</b> |
|-------------|--------------------------------------------------------------------------------------------------|--------------|-------------------------|------------------------|-----------------------------------|---------------------------------|--------------------------------|--------------------------------|
| 270         | Diethylene glycol                                                                                | 111-46-6     | 0.5%                    | 4.2                    | 0.5                               | 0.7                             | 0.2                            | 1.8                            |
| 271         | Ferric chloride                                                                                  | 7705-08-0    | 0.5%                    | 171                    | 30                                | 29                              | 3.5                            | 52                             |
| 272         | Potassium hydroxide                                                                              | 1310-58-3    | 0.5%                    | 4,198                  | 330                               | 700                             | <0.1                           | 2,495                          |
| 273         | Sodium hydroxide                                                                                 | 1310-73-2    | 0.5%                    | 28                     | <0.1                              | 4.7                             | <0.1                           | 15                             |
| 274         | Tannin, sodium salt polymer with acrylic monomers                                                | Proprietary  | 0.5%                    | --                     | --                                | --                              | --                             | --                             |
| 275         | Walnut shells                                                                                    | Proprietary  | 0.5%                    | 3,538                  | 488                               | 590                             | 113                            | 1,111                          |
| 276         | Water (including mix water supplied by client)                                                   | Proprietary  | 0.5%                    | 159,143                | 27,193                            | 26,524                          | 24,310                         | 27,540                         |
| 277         | 1-Eicosene                                                                                       | 3452-07-1    | 0.4%                    | <0.1                   | <0.1                              | <0.1                            | <0.1                           | <0.1                           |
| 278         | 1-Hexadecene                                                                                     | 629-73-2     | 0.4%                    | 0.9                    | 0.2                               | 0.2                             | 0.1                            | 0.2                            |
| 279         | 1-Octadecene                                                                                     | 112-88-9     | 0.4%                    | 0.9                    | 0.2                               | 0.2                             | 0.1                            | 0.2                            |
| 280         | 1-Tetradecene                                                                                    | 1120-36-1    | 0.4%                    | <0.1                   | <0.1                              | <0.1                            | <0.1                           | <0.1                           |
| 281         | Acrylic co-polymer                                                                               | Proprietary  | 0.4%                    | --                     | --                                | --                              | --                             | --                             |
| 282         | Amide surfactant phosphate                                                                       | Proprietary  | 0.4%                    | --                     | --                                | --                              | --                             | --                             |
| 283         | Fatty acids, tall oil                                                                            | 61790-12-3   | 0.4%                    | 31                     | 7.1                               | 6.3                             | 2.4                            | 8.6                            |
| 284         | Glycol                                                                                           | Proprietary  | 0.4%                    | --                     | --                                | --                              | --                             | --                             |
| 285         | Halad-322                                                                                        | Proprietary  | 0.4%                    | --                     | --                                | --                              | --                             | --                             |
| 286         | Modified lignosulfonate                                                                          | Proprietary  | 0.4%                    | --                     | --                                | --                              | --                             | --                             |
| 287         | Naphthalene sulfonic acid, polymer with formaldehyde, sodium salt                                | Proprietary  | 0.4%                    | 45                     | 9.0                               | 9.0                             | 9.0                            | 9.0                            |
| 288         | Silicone                                                                                         | Proprietary  | 0.4%                    | --                     | --                                | --                              | --                             | --                             |
| 289         | Silicone fluid                                                                                   | Proprietary  | 0.4%                    | --                     | --                                | --                              | --                             | --                             |
| 290         | 1-Butanol                                                                                        | 71-36-3      | 0.3%                    | <0.1                   | <0.1                              | <0.1                            | <0.1                           | <0.1                           |
| 291         | 1-Propanaminium, N-(carboxymethyl)-N,N-dimethyl-3-(((13Z)-1-oxo-13-docosenyl)amino)-, inner salt | 149879-98-1  | 0.3%                    | 13                     | 3.2                               | 3.2                             | 2.3                            | 4.3                            |
| 292         | Acetic acid ethenyl ester, polymer with choroethene and ethene                                   | 25085-46-5   | 0.3%                    | <0.1                   | <0.1                              | <0.1                            | <0.1                           | <0.1                           |
| 293         | Acetophenone                                                                                     | 98-86-2      | 0.3%                    | 3.9                    | <0.1                              | 1.0                             | <0.1                           | 3.9                            |
| 294         | Amide surfactant ester acid salt                                                                 | Proprietary  | 0.3%                    | --                     | --                                | --                              | --                             | --                             |
| 295         | Ammonium fluoride                                                                                | 12125-01-8   | 0.3%                    | 1,141                  | 272                               | 285                             | 261                            | 336                            |

| Rank | Constituent                                                              | CASRN       | Freq. of use (%) | Total mass (kg) | Median mass per event (kg) | Mean mass per event (kg) | Min mass per event (kg) | Max mass per event (kg) |
|------|--------------------------------------------------------------------------|-------------|------------------|-----------------|----------------------------|--------------------------|-------------------------|-------------------------|
| 296  | Anti-foamer                                                              | Proprietary | 0.3%             | --              | --                         | --                       | --                      | --                      |
| 297  | Benzenesulfonic acid, C10-16-alkyl derivs., compds. with 2-propanamine   | 68584-24-7  | 0.3%             | 4.5             | 1.1                        | 1.1                      | 0.5                     | 1.9                     |
| 298  | Benzenesulfonic acid, C10-16-alkyl derivs., compds. with triethanolamine | 68584-25-8  | 0.3%             | 4.5             | 1.1                        | 1.1                      | 0.5                     | 1.9                     |
| 299  | Carbon                                                                   | Proprietary | 0.3%             | --              | --                         | --                       | --                      | --                      |
| 300  | Coal, ground                                                             | 50815-10-6  | 0.3%             | 429             | 94                         | 107                      | 15                      | 227                     |
| 301  | Corrosion inhibitor                                                      | Proprietary | 0.3%             | --              | --                         | --                       | --                      | --                      |
| 302  | Dispersant                                                               | Proprietary | 0.3%             | --              | --                         | --                       | --                      | --                      |
| 303  | Emulsion of complex stearates                                            | Proprietary | 0.3%             | 102             | 23                         | 26                       | 23                      | 34                      |
| 304  | Ethoxylated hexanol                                                      | 68439-45-2  | 0.3%             | 58              | 16                         | 15                       | 3.7                     | 22                      |
| 305  | Fatty acid ester                                                         | Proprietary | 0.3%             | --              | --                         | --                       | --                      | --                      |
| 306  | Formate salt                                                             | Proprietary | 0.3%             | --              | --                         | --                       | --                      | --                      |
| 307  | Graphite                                                                 | 7782-42-5   | 0.3%             | 704             | 101                        | 176                      | 7.5                     | 494                     |
| 308  | Inorganic potassium                                                      | Proprietary | 0.3%             | --              | --                         | --                       | --                      | --                      |
| 309  | Lignosulfonic acid, calcium salt                                         | 8061-52-7   | 0.3%             | 0.1             | <0.1                       | <0.1                     | <0.1                    | 0.1                     |
| 310  | Linear/branched alcohol ethoxylate (11eo)                                | 127036-24-2 | 0.3%             | <0.1            | <0.1                       | <0.1                     | <0.1                    | <0.1                    |
| 311  | Petroleum distillates                                                    | 68990-35-2  | 0.3%             | 109             | 24                         | 27                       | 22                      | 39                      |
| 312  | Poly(sodium styrenesulfonate)                                            | 25704-18-1  | 0.3%             | <0.1            | <0.1                       | <0.1                     | <0.1                    | <0.1                    |
| 313  | Silica fume                                                              | Proprietary | 0.3%             | --              | --                         | --                       | --                      | --                      |
| 314  | Sodium chloroacetate                                                     | 3926-62-3   | 0.3%             | <0.1            | <0.1                       | <0.1                     | <0.1                    | <0.1                    |
| 315  | Sulfonate salt                                                           | Proprietary | 0.3%             | --              | --                         | --                       | --                      | --                      |
| 316  | Sulfuric acid, barium salt (1:1)                                         | Proprietary | 0.3%             | 3,311           | 726                        | 828                      | 680                     | 1,179                   |
| 317  | Talc                                                                     | 14807-96-6  | 0.3%             | <0.1            | <0.1                       | <0.1                     | <0.1                    | <0.1                    |
| 318  | Undecanol, branched and linear                                           | 128973-77-3 | 0.3%             | <0.1            | <0.1                       | <0.1                     | <0.1                    | <0.1                    |
| 319  | Vinylidene chloride/methylacrylate copolymer                             | 25038-72-6  | 0.3%             | <0.1            | <0.1                       | <0.1                     | <0.1                    | <0.1                    |
| 320  | 1,2,3-Trimethylbenzene                                                   | 526-73-8    | 0.3%             | 3.2             | 1.0                        | 1.1                      | 0.9                     | 1.4                     |
| 321  | 1,3,5-Trimethylbenzene                                                   | 108-67-8    | 0.3%             | 7.3             | 2.3                        | 2.4                      | 1.9                     | 3.1                     |
| 322  | Acid modified petroleum residue                                          | Proprietary | 0.3%             | --              | --                         | --                       | --                      | --                      |

| Rank | Constituent                                                                         | CASRN       | Freq. of use (%) | Total mass (kg) | Median mass per event (kg) | Mean mass per event (kg) | Min mass per event (kg) | Max mass per event (kg) |
|------|-------------------------------------------------------------------------------------|-------------|------------------|-----------------|----------------------------|--------------------------|-------------------------|-------------------------|
| 323  | Aliphatic alcohol (1)                                                               | Proprietary | 0.3%             | --              | --                         | --                       | --                      | --                      |
| 324  | Aliphatic alcohol (2)                                                               | Proprietary | 0.3%             | --              | --                         | --                       | --                      | --                      |
| 325  | Aliphatic alcohol (3)                                                               | Proprietary | 0.3%             | --              | --                         | --                       | --                      | --                      |
| 326  | Alkyl benzenesulfonic acid                                                          | Proprietary | 0.3%             | --              | --                         | --                       | --                      | --                      |
| 327  | Alkyl diamide                                                                       | Proprietary | 0.3%             | --              | --                         | --                       | --                      | --                      |
| 328  | Alkyne alcohol                                                                      | Proprietary | 0.3%             | --              | --                         | --                       | --                      | --                      |
| 329  | Ammonium salt                                                                       | Proprietary | 0.3%             | --              | --                         | --                       | --                      | --                      |
| 330  | Ammonium sulfate                                                                    | 7783-20-2   | 0.3%             | 21.6            | 7.2                        | 7.2                      | 7.2                     | 7.2                     |
| 331  | Anionic polyacrylamide                                                              | Proprietary | 0.3%             | 50              | 13                         | 17                       | 13                      | 25                      |
| 332  | Anionic polymer                                                                     | Proprietary | 0.3%             | --              | --                         | --                       | --                      | --                      |
| 333  | Aromatic amines, TOFA salt                                                          | Proprietary | 0.3%             | --              | --                         | --                       | --                      | --                      |
| 334  | Aromatic compound (1)                                                               | Proprietary | 0.3%             | --              | --                         | --                       | --                      | --                      |
| 335  | Aromatic compound (2)                                                               | Proprietary | 0.3%             | --              | --                         | --                       | --                      | --                      |
| 336  | Aromatic compound (3)                                                               | Proprietary | 0.3%             | --              | --                         | --                       | --                      | --                      |
| 337  | Aromatic compound (4)                                                               | Proprietary | 0.3%             | --              | --                         | --                       | --                      | --                      |
| 338  | Aromatic compound (5)                                                               | Proprietary | 0.3%             | --              | --                         | --                       | --                      | --                      |
| 339  | Aromatic compound (6)                                                               | Proprietary | 0.3%             | --              | --                         | --                       | --                      | --                      |
| 340  | Aromatic hydrocarbon                                                                | Proprietary | 0.3%             | --              | --                         | --                       | --                      | --                      |
| 341  | Canola oil                                                                          | 120962-03-0 | 0.3%             | 350             | 92                         | 117                      | 75                      | 183                     |
| 342  | Cement retarder                                                                     | Proprietary | 0.3%             | --              | --                         | --                       | --                      | --                      |
| 343  | Clay                                                                                | Proprietary | 0.3%             | --              | --                         | --                       | --                      | --                      |
| 344  | Complex stearates                                                                   | Proprietary | 0.3%             | 91              | 23                         | 30                       | 11                      | 57                      |
| 345  | Cyclohexasiloxane, 2,2,4,4,6,6,8,8,10,10,12,12-dodecamethyl-                        | 540-97-6    | 0.3%             | 0.1             | <0.1                       | <0.1                     | <0.1                    | <0.1                    |
| 346  | Cyclopentasiloxane, 2,2,4,4,6,6,8,8,10,10-decamethyl-                               | 541-02-6    | 0.3%             | 0.1             | <0.1                       | <0.1                     | <0.1                    | <0.1                    |
| 347  | DBNPA (2,2-dibromo-3-nitrilopropionamide)                                           | 10222-01-2  | 0.3%             | 10              | 4.1                        | 3.3                      | <0.1                    | 5.9                     |
| 348  | Enviro Og                                                                           | Proprietary | 0.3%             | --              | --                         | --                       | --                      | --                      |
| 349  | Fatty acid                                                                          | Proprietary | 0.3%             | --              | --                         | --                       | --                      | --                      |
| 350  | Formaldehyde, polymer with 4-(1,1-dimethylethyl)phenol, 2-methyloxirane and oxirane | 30704-64-4  | 0.3%             | 0.1             | <0.1                       | <0.1                     | <0.1                    | 0.1                     |
| 351  | Guar gum                                                                            | 9000-30-0   | 0.3%             | 1,667           | 819                        | 556                      | 2.6                     | 845                     |

| <b>Rank</b> | <b>Constituent</b>                       | <b>CASRN</b> | <b>Freq. of use (%)</b> | <b>Total mass (kg)</b> | <b>Median mass per event (kg)</b> | <b>Mean mass per event (kg)</b> | <b>Min mass per event (kg)</b> | <b>Max mass per event (kg)</b> |
|-------------|------------------------------------------|--------------|-------------------------|------------------------|-----------------------------------|---------------------------------|--------------------------------|--------------------------------|
| 352         | Inorganic salt of an acid                | Proprietary  | 0.3%                    | --                     | --                                | --                              | --                             | --                             |
| 353         | Ionic compound                           | Proprietary  | 0.3%                    | --                     | --                                | --                              | --                             | --                             |
| 354         | Lecithins                                | 8002-43-5    | 0.3%                    | 4.7                    | 1.4                               | 1.6                             | 0.3                            | 3.0                            |
| 355         | MBNPA (2-bromo-3-nitrilopropionamide)    | 1113-55-9    | 0.3%                    | <0.1                   | <0.1                              | <0.1                            | <0.1                           | <0.1                           |
| 356         | Monoethanolamine borate (1:X)            | 26038-87-9   | 0.3%                    | 245                    | 123                               | 82                              | 0.1                            | 123                            |
| 357         | Nap-formaldehyde condensate, sodium salt | Proprietary  | 0.3%                    | --                     | --                                | --                              | --                             | --                             |
| 358         | Naphthalene sulfonate-formaldehyde       | Proprietary  | 0.3%                    | --                     | --                                | --                              | --                             | --                             |
| 359         | Nonionic defoaming agent                 | Proprietary  | 0.3%                    | --                     | --                                | --                              | --                             | --                             |
| 360         | Octamethylcyclotetrasiloxane             | 556-67-2     | 0.3%                    | 0.1                    | <0.1                              | <0.1                            | <0.1                           | <0.1                           |
| 361         | Organosulfur compound (1)                | Proprietary  | 0.3%                    | --                     | --                                | --                              | --                             | --                             |
| 362         | Organosulfur compound (2)                | Proprietary  | 0.3%                    | --                     | --                                | --                              | --                             | --                             |
| 363         | Oxyalkylated polyamine                   | Proprietary  | 0.3%                    | --                     | --                                | --                              | --                             | --                             |
| 364         | Phosphonate salt                         | Proprietary  | 0.3%                    | --                     | --                                | --                              | --                             | --                             |
| 365         | Polyacrylate                             | Proprietary  | 0.3%                    | --                     | --                                | --                              | --                             | --                             |
| 366         | Polyanionic cellulosic polymer           | Proprietary  | 0.3%                    | --                     | --                                | --                              | --                             | --                             |
| 367         | Polyanionic polymer                      | Proprietary  | 0.3%                    | --                     | --                                | --                              | --                             | --                             |
| 368         | Polycyclic aromatic hydrocarbon          | Proprietary  | 0.3%                    | --                     | --                                | --                              | --                             | --                             |
| 369         | Sodium persulfate                        | 7775-27-1    | 0.3%                    | 35                     | 16                                | 12                              | <0.1                           | 19                             |
| 370         | Sugar                                    | Proprietary  | 0.3%                    | 98                     | 34                                | 33                              | 9.1                            | 54                             |
| 371         | Sulfate                                  | Proprietary  | 0.3%                    | --                     | --                                | --                              | --                             | --                             |
| 372         | Tetrasodium ethylenediaminetetraacetate  | 64-02-8      | 0.3%                    | 0.1                    | <0.1                              | <0.1                            | <0.1                           | <0.1                           |
| 373         | Vinyl copolymer                          | Proprietary  | 0.3%                    | --                     | --                                | --                              | --                             | --                             |
| 374         | 2-Methyl-3(2H)-isothiazolone             | 2682-20-4    | 0.2%                    | 5.2                    | 2.6                               | 2.6                             | <0.1                           | 5.2                            |
| 375         | Acetic anhydride                         | 108-24-7     | 0.2%                    | 49                     | 25                                | 25                              | 8.2                            | 41                             |
| 376         | Aliphatic sulfonate                      | Proprietary  | 0.2%                    | --                     | --                                | --                              | --                             | --                             |
| 377         | Aluminum oxide silicate                  | 12141-46-7   | 0.2%                    | 140                    | 70                                | 70                              | 31                             | 110                            |
| 378         | Amide surfactant salt of organic acid    | Proprietary  | 0.2%                    | --                     | --                                | --                              | --                             | --                             |
| 379         | Amine salts                              | Proprietary  | 0.2%                    | --                     | --                                | --                              | --                             | --                             |

| <b>Rank</b> | <b>Constituent</b>                                         | <b>CASRN</b> | <b>Freq. of use (%)</b> | <b>Total mass (kg)</b> | <b>Median mass per event (kg)</b> | <b>Mean mass per event (kg)</b> | <b>Min mass per event (kg)</b> | <b>Max mass per event (kg)</b> |
|-------------|------------------------------------------------------------|--------------|-------------------------|------------------------|-----------------------------------|---------------------------------|--------------------------------|--------------------------------|
| 380         | Blend of vegetable and polymer fibers                      | Proprietary  | 0.2%                    | --                     | --                                | --                              | --                             | --                             |
| 381         | D-Air 5000                                                 | Proprietary  | 0.2%                    | --                     | --                                | --                              | --                             | --                             |
| 382         | D-Mulse                                                    | Proprietary  | 0.2%                    | --                     | --                                | --                              | --                             | --                             |
| 383         | Enviro C-Inhib                                             | Proprietary  | 0.2%                    | --                     | --                                | --                              | --                             | --                             |
| 384         | Enviro D-Mulse                                             | Proprietary  | 0.2%                    | --                     | --                                | --                              | --                             | --                             |
| 385         | Ethoxylated alcohols C12-16                                | Proprietary  | 0.2%                    | --                     | --                                | --                              | --                             | --                             |
| 386         | Ethoxylated nonylphenol alcohol                            | Proprietary  | 0.2%                    | --                     | --                                | --                              | --                             | --                             |
| 387         | Ethoxylated surfactant                                     | Proprietary  | 0.2%                    | --                     | --                                | --                              | --                             | --                             |
| 388         | Ethylene oxide-nonylphenol polymer                         | Proprietary  | 0.2%                    | --                     | --                                | --                              | --                             | --                             |
| 389         | Fatty acid esters                                          | Proprietary  | 0.2%                    | --                     | --                                | --                              | --                             | --                             |
| 390         | Fatty acid oxyalkylate                                     | Proprietary  | 0.2%                    | --                     | --                                | --                              | --                             | --                             |
| 391         | Glycerol                                                   | 56-81-5      | 0.2%                    | 0.3                    | 0.1                               | 0.1                             | 0.1                            | 0.2                            |
| 392         | HR-5                                                       | Proprietary  | 0.2%                    | --                     | --                                | --                              | --                             | --                             |
| 393         | Hydroxide                                                  | Proprietary  | 0.2%                    | --                     | --                                | --                              | --                             | --                             |
| 394         | Inorganic salt                                             | Proprietary  | 0.2%                    | --                     | --                                | --                              | --                             | --                             |
| 395         | Lignin                                                     | 9005-53-2    | 0.2%                    | 0.2                    | 0.1                               | 0.1                             | 0.1                            | 0.1                            |
| 396         | Lithium carbonate                                          | 554-13-2     | 0.2%                    | 43                     | 22                                | 22                              | 11                             | 32                             |
| 397         | Lithium chloride                                           | 7447-41-8    | 0.2%                    | 43                     | 22                                | 22                              | 11                             | 32                             |
| 398         | Lithium hydroxide                                          | 1310-65-2    | 0.2%                    | 43                     | 22                                | 22                              | 11                             | 32                             |
| 399         | Lithium hypochlorite                                       | 13840-33-0   | 0.2%                    | 258                    | 129                               | 129                             | 67                             | 191                            |
| 400         | Modified acrylamide co-polymer                             | Proprietary  | 0.2%                    | --                     | --                                | --                              | --                             | --                             |
| 401         | M-SOLV                                                     | Proprietary  | 0.2%                    | --                     | --                                | --                              | --                             | --                             |
| 402         | Mud Flush III                                              | Proprietary  | 0.2%                    | --                     | --                                | --                              | --                             | --                             |
| 403         | N,N-Bis(carboxymethyl)-L-glutamic acid                     | 58976-65-1   | 0.2%                    | 641                    | 321                               | 321                             | 321                            | 321                            |
| 404         | Naphtha (petroleum), heavy catalytic reformed              | 64741-68-0   | 0.2%                    | 35                     | 18                                | 18                              | 0.5                            | 35                             |
| 405         | Naphthalene sulfonate-formaldehyde condensate, sodium salt | 9008-63-3    | 0.2%                    | 0.1                    | 0.1                               | 0.1                             | <0.1                           | 0.1                            |
| 406         | Natural peat                                               | Proprietary  | 0.2%                    | 1,073                  | 536                               | 536                             | 352                            | 721                            |

| <b>Rank</b> | <b>Constituent</b>                                                                                        | <b>CASRN</b> | <b>Freq. of use (%)</b> | <b>Total mass (kg)</b> | <b>Median mass per event (kg)</b> | <b>Mean mass per event (kg)</b> | <b>Min mass per event (kg)</b> | <b>Max mass per event (kg)</b> |
|-------------|-----------------------------------------------------------------------------------------------------------|--------------|-------------------------|------------------------|-----------------------------------|---------------------------------|--------------------------------|--------------------------------|
| 407         | Organic acid salt 2                                                                                       | Proprietary  | 0.2%                    | --                     | --                                | --                              | --                             | --                             |
| 408         | Plaster of paris                                                                                          | 26499-65-0   | 0.2%                    | 1,394                  | 697                               | 697                             | 697                            | 697                            |
| 409         | Polyacrylamide                                                                                            | 26006-22-4   | 0.2%                    | 57                     | 28                                | 28                              | 7.1                            | 50                             |
| 410         | Polyacrylamide blend                                                                                      | Proprietary  | 0.2%                    | 9.1                    | 4.5                               | 4.5                             | 3.6                            | 5.4                            |
| 411         | Polyphosphate ester                                                                                       | Proprietary  | 0.2%                    | 1,436                  | 718                               | 718                             | 25.9                           | 1,410                          |
| 412         | Potassium hydrogen sulfate                                                                                | 7646-93-7    | 0.2%                    | 86                     | 43                                | 43                              | 22.5                           | 64                             |
| 413         | Proprietary materials                                                                                     | Proprietary  | 0.2%                    | 1,678                  | 839                               | 839                             | 272                            | 1,406                          |
| 414         | Quaternary amine                                                                                          | Proprietary  | 0.2%                    | --                     | --                                | --                              | --                             | --                             |
| 415         | Quaternary ammonium compounds, benzyl(hydrogenated tallow alkyl)dimethyl, stearates, salts with bentonite | 121888-68-4  | 0.2%                    | 4.2                    | 2.1                               | 2.1                             | 2.1                            | 2.1                            |
| 416         | Saturated alcohols                                                                                        | Proprietary  | 0.2%                    | --                     | --                                | --                              | --                             | --                             |
| 417         | Sawdust                                                                                                   | Proprietary  | 0.2%                    | 1,474                  | 737                               | 737                             | 590                            | 885                            |
| 418         | Silica                                                                                                    | 61790-53-2   | 0.2%                    | 16,520                 | 8,260                             | 8,260                           | 5,414                          | 11,107                         |
| 419         | Silica gel                                                                                                | 112926-00-8  | 0.2%                    | 0.2                    | 0.1                               | 0.1                             | 0.1                            | 0.1                            |
| 420         | Sodium hypochlorite                                                                                       | 7681-52-9    | 0.2%                    | 4.7                    | 2.3                               | 2.3                             | 2.3                            | 2.3                            |
| 421         | Sulfurous acid, sodium salt (1:1), polymer with formaldehyde and 1,3,5-triazine-2,4,6-triamine            | 64787-97-9   | 0.2%                    | 0.5                    | 0.3                               | 0.3                             | 0.1                            | 0.4                            |
| 422         | Surfactant mixture                                                                                        | Proprietary  | 0.2%                    | --                     | --                                | --                              | --                             | --                             |
| 423         | Surfactant, phosphate acid salt                                                                           | Proprietary  | 0.2%                    | --                     | --                                | --                              | --                             | --                             |
| 424         | Tetrasodium glutamate diacetate                                                                           | 51981-21-6   | 0.2%                    | 321                    | 160                               | 160                             | 160                            | 160                            |
| 425         | UCS                                                                                                       | Proprietary  | 0.2%                    | --                     | --                                | --                              | --                             | --                             |
| 426         | Unknown                                                                                                   | Proprietary  | 0.2%                    | --                     | --                                | --                              | --                             | --                             |
| 427         | Wood fiber                                                                                                | Proprietary  | 0.2%                    | 1,402                  | 701                               | 701                             | 27                             | 1,374                          |
| 428         | Zinc sulfate                                                                                              | 7733-02-0    | 0.2%                    | 100                    | 50                                | 50                              | 50                             | 50                             |
| 429         | 1-Methoxy-2-hydroxypropane                                                                                | 107-98-2     | 0.1%                    | 94                     | 94                                | 94                              | 94                             | 94                             |
| 430         | 1-Octanesulfonic acid sodium salt                                                                         | 5324-84-5    | 0.1%                    | 157                    | 157                               | 157                             | 157                            | 157                            |



| <b>Rank</b> | <b>Constituent</b>                                                                                | <b>CASRN</b> | <b>Freq. of use (%)</b> | <b>Total mass (kg)</b> | <b>Median mass per event (kg)</b> | <b>Mean mass per event (kg)</b> | <b>Min mass per event (kg)</b> | <b>Max mass per event (kg)</b> |
|-------------|---------------------------------------------------------------------------------------------------|--------------|-------------------------|------------------------|-----------------------------------|---------------------------------|--------------------------------|--------------------------------|
| 431         | 2-Propen-1-aminium, N,N-dimethyl-N-2-propen-1-yl-, chloride (1:1), homopolymer                    | 26062-79-3   | 0.1%                    | 75                     | 75                                | 75                              | 75                             | 75                             |
| 432         | 2,4-Dihydroxy-2-methylpentane                                                                     | 107-41-5     | 0.1%                    | 148                    | 148                               | 148                             | 148                            | 148                            |
| 433         | 2-Propenoic acid, polymer with 2-propenamide                                                      | 9003-06-9    | 0.1%                    | 0.2                    | 0.2                               | 0.2                             | 0.2                            | 0.2                            |
| 434         | 2-Propenoic acid, polymer with sodium 2-propenoate                                                | 9033-79-8    | 0.1%                    | 10                     | 10                                | 10                              | 10                             | 10                             |
| 435         | 5-Chloro-2-methyl-3(2H)-isothiazolone                                                             | 26172-55-4   | 0.1%                    | 5.2                    | 5.2                               | 5.2                             | 5.2                            | 5.2                            |
| 436         | Alcohol                                                                                           | Proprietary  | 0.1%                    | --                     | --                                | --                              | --                             | --                             |
| 437         | Alkenes                                                                                           | Proprietary  | 0.1%                    | --                     | --                                | --                              | --                             | --                             |
| 438         | Alkyl ether of corn sugar                                                                         | Proprietary  | 0.1%                    | 115                    | 115                               | 115                             | 115                            | 115                            |
| 439         | Aluminium distearate                                                                              | 300-92-5     | 0.1%                    | <0.1                   | <0.1                              | <0.1                            | <0.1                           | <0.1                           |
| 440         | Amide surfactant                                                                                  | 68647-77-8   | 0.1%                    | 292                    | 292                               | 292                             | 292                            | 292                            |
| 441         | Anionic copolymer                                                                                 | Proprietary  | 0.1%                    | --                     | --                                | --                              | --                             | --                             |
| 442         | Aromatic amines, TOFA salts                                                                       | Proprietary  | 0.1%                    | --                     | --                                | --                              | --                             | --                             |
| 443         | Aromatic hydrocarbon (1) benzenesulfonic acid, C10-16-alkyl derivs., compds. with cyclohexylamine | Proprietary  | 0.1%                    | --                     | --                                | --                              | --                             | --                             |
| 444         | Aromatic hydrocarbons (7)                                                                         | Proprietary  | 0.1%                    | --                     | --                                | --                              | --                             | --                             |
| 445         | BA-10A                                                                                            | Proprietary  | 0.1%                    | --                     | --                                | --                              | --                             | --                             |
| 446         | Benzene, tetrapropylene                                                                           | 25265-78-5   | 0.1%                    | 2.7                    | 2.7                               | 2.7                             | 2.7                            | 2.7                            |
| 447         | Benzoisothiazolinone                                                                              | 2634-33-5    | 0.1%                    | <0.1                   | <0.1                              | <0.1                            | <0.1                           | <0.1                           |
| 448         | Calcium carbonate                                                                                 | Proprietary  | 0.1%                    | --                     | --                                | --                              | --                             | --                             |
| 449         | Calcium salts                                                                                     | Proprietary  | 0.1%                    | --                     | --                                | --                              | --                             | --                             |
| 450         | Calcium sulfate                                                                                   | Proprietary  | 0.1%                    | --                     | --                                | --                              | --                             | --                             |
| 451         | Cap                                                                                               | Proprietary  | 0.1%                    | --                     | --                                | --                              | --                             | --                             |
| 452         | Cellulose                                                                                         | Proprietary  | 0.1%                    | --                     | --                                | --                              | --                             | --                             |
| 453         | Cf Desco II                                                                                       | Proprietary  | 0.1%                    | --                     | --                                | --                              | --                             | --                             |
| 454         | Choline chloride                                                                                  | 67-48-1      | 0.1%                    | 141                    | 141                               | 141                             | 141                            | 141                            |
| 455         | C-Inhib                                                                                           | Proprietary  | 0.1%                    | --                     | --                                | --                              | --                             | --                             |
| 456         | Citrus extract                                                                                    | Proprietary  | 0.1%                    | 57                     | 57                                | 57                              | 57                             | 57                             |
| 457         | Conqor 404                                                                                        | Proprietary  | 0.1%                    | --                     | --                                | --                              | --                             | --                             |

| <b>Rank</b> | <b>Constituent</b>                                                                 | <b>CASRN</b> | <b>Freq. of use (%)</b> | <b>Total mass (kg)</b> | <b>Median mass per event (kg)</b> | <b>Mean mass per event (kg)</b> | <b>Min mass per event (kg)</b> | <b>Max mass per event (kg)</b> |
|-------------|------------------------------------------------------------------------------------|--------------|-------------------------|------------------------|-----------------------------------|---------------------------------|--------------------------------|--------------------------------|
| 458         | Corrosion control                                                                  | Proprietary  | 0.1%                    | --                     | --                                | --                              | --                             | --                             |
| 459         | Deflocculant                                                                       | Proprietary  | 0.1%                    | --                     | --                                | --                              | --                             | --                             |
| 460         | Defoamer                                                                           | Proprietary  | 0.1%                    | --                     | --                                | --                              | --                             | --                             |
| 461         | Defoamer 7                                                                         | Proprietary  | 0.1%                    | --                     | --                                | --                              | --                             | --                             |
| 462         | Defoam-X                                                                           | Proprietary  | 0.1%                    | --                     | --                                | --                              | --                             | --                             |
| 463         | Diethanolamine                                                                     | Proprietary  | 0.1%                    | --                     | --                                | --                              | --                             | --                             |
| 464         | Diisopropyl naphthalenesulfonic acid                                               | 28757-00-8   | 0.1%                    | 26                     | 26                                | 26                              | 26                             | 26                             |
| 465         | Distillates (petroleum), hydrotreated light; kerosene - unspecified                | Proprietary  | 0.1%                    | 57                     | 57                                | 57                              | 57                             | 57                             |
| 466         | Dodecyl(2-hydroxy-3-sulfonatopropyl)dimethylammonium                               | 13197-76-7   | 0.1%                    | 73                     | 73                                | 73                              | 73                             | 73                             |
| 467         | Dodecylbenzene                                                                     | 123-01-3     | 0.1%                    | 5.4                    | 5.4                               | 5.4                             | 5.4                            | 5.4                            |
| 468         | Drilling detergent                                                                 | Proprietary  | 0.1%                    | --                     | --                                | --                              | --                             | --                             |
| 469         | Drilling mud additive                                                              | Proprietary  | 0.1%                    | --                     | --                                | --                              | --                             | --                             |
| 470         | EDTA/copper chelate                                                                | Proprietary  | 0.1%                    | --                     | --                                | --                              | --                             | --                             |
| 471         | Emulsifier                                                                         | Proprietary  | 0.1%                    | --                     | --                                | --                              | --                             | --                             |
| 472         | Enviro M-Solv                                                                      | Proprietary  | 0.1%                    | --                     | --                                | --                              | --                             | --                             |
| 473         | Ethanol,2,2'-oxybis-, reaction products with ammonia, morpholine derivs., residues | 68909-77-3   | 0.1%                    | 91                     | 91                                | 91                              | 91                             | 91                             |
| 474         | Ethoxylate                                                                         | Proprietary  | 0.1%                    | --                     | --                                | --                              | --                             | --                             |
| 475         | Ethoxylated alkyl amines                                                           | Proprietary  | 0.1%                    | --                     | --                                | --                              | --                             | --                             |
| 476         | Ethoxylated cyclic amines                                                          | Proprietary  | 0.1%                    | --                     | --                                | --                              | --                             | --                             |
| 477         | Glycolic acid                                                                      | 79-14-1      | 0.1%                    | 89                     | 89                                | 89                              | 89                             | 89                             |
| 478         | Halad-344                                                                          | Proprietary  | 0.1%                    | --                     | --                                | --                              | --                             | --                             |
| 479         | Inorganic nitrate salt                                                             | Proprietary  | 0.1%                    | --                     | --                                | --                              | --                             | --                             |
| 480         | Inorganic solvents                                                                 | Proprietary  | 0.1%                    | --                     | --                                | --                              | --                             | --                             |
| 481         | Lignosulfonic acid, ethoxylated, sodium salts                                      | 68611-14-3   | 0.1%                    | 543                    | 543                               | 543                             | 543                            | 543                            |
| 482         | Lithium chlorate                                                                   | 13453-71-9   | 0.1%                    | 11                     | 11                                | 11                              | 11                             | 11                             |
| 483         | Lithium chlorate                                                                   | Proprietary  | 0.1%                    | 32                     | 32                                | 32                              | 32                             | 32                             |
| 484         | Lubricant (complex stearates)                                                      | Proprietary  | 0.1%                    | --                     | --                                | --                              | --                             | --                             |

| <b>Rank</b> | <b>Constituent</b>                                                                           | <b>CASRN</b> | <b>Freq. of use (%)</b> | <b>Total mass (kg)</b> | <b>Median mass per event (kg)</b> | <b>Mean mass per event (kg)</b> | <b>Min mass per event (kg)</b> | <b>Max mass per event (kg)</b> |
|-------------|----------------------------------------------------------------------------------------------|--------------|-------------------------|------------------------|-----------------------------------|---------------------------------|--------------------------------|--------------------------------|
| 485         | Maltodextrin                                                                                 | 9050-36-6    | 0.1%                    | 31                     | 31                                | 31                              | 31                             | 31                             |
| 486         | Mixture of surfactants                                                                       | Proprietary  | 0.1%                    | --                     | --                                | --                              | --                             | --                             |
| 487         | Modified alkanolamide                                                                        | Proprietary  | 0.1%                    | 286                    | 286                               | 286                             | 286                            | 286                            |
| 488         | Modified lignin                                                                              | Proprietary  | 0.1%                    | 0.2                    | 0.2                               | 0.2                             | 0.2                            | 0.2                            |
| 489         | Monoethanolamine                                                                             | 141-43-5     | 0.1%                    | 0.5                    | 0.5                               | 0.5                             | 0.5                            | 0.5                            |
| 490         | Naphthalene sulfonate-formaldehyde condensate                                                | Proprietary  | 0.1%                    | --                     | --                                | --                              | --                             | --                             |
| 491         | Non-hazardous organic compound                                                               | Proprietary  | 0.1%                    | --                     | --                                | --                              | --                             | --                             |
| 492         | Nonylphenol                                                                                  | Proprietary  | 0.1%                    | --                     | --                                | --                              | --                             | --                             |
| 493         | Organic acid                                                                                 | Proprietary  | 0.1%                    | --                     | --                                | --                              | --                             | --                             |
| 494         | Petroleum distillate-mineral oil grade                                                       | 8002-05-9    | 0.1%                    | 30                     | 30                                | 30                              | 30                             | 30                             |
| 495         | Petroleum distillates                                                                        | 64741-44-2   | 0.1%                    | 138,679                | 138,679                           | 138,679                         | 138,679                        | 138,679                        |
| 496         | Petroleum distillates                                                                        | 64742-46-7   | 0.1%                    | 138,679                | 138,679                           | 138,679                         | 138,679                        | 138,679                        |
| 497         | Phosphate ester                                                                              | Proprietary  | 0.1%                    | 1,073                  | 1,073                             | 1,073                           | 1,073                          | 1,073                          |
| 498         | Poly(oxy-1,2-ethanediyl), .alpha.-sulfo-.omega.-hydroxy-, C6-10-alkyl ethers, ammonium salts | 68037-05-8   | 0.1%                    | 297                    | 297                               | 297                             | 297                            | 297                            |
| 499         | Poly(oxy-1,2-ethanediyl), alpha-hexyl-omega-hydroxy                                          | 31726-34-8   | 0.1%                    | 21                     | 21                                | 21                              | 21                             | 21                             |
| 500         | Polyepichlorohydrin, trimethyl amine quaternized                                             | 51838-31-4   | 0.1%                    | 60                     | 60                                | 60                              | 60                             | 60                             |
| 501         | Polymer and water                                                                            | Proprietary  | 0.1%                    | --                     | --                                | --                              | --                             | --                             |
| 502         | Polynuclear aromatic hydrocarbon                                                             | Proprietary  | 0.1%                    | --                     | --                                | --                              | --                             | --                             |
| 503         | Polyolphospate ester                                                                         | Proprietary  | 0.1%                    | 58                     | 58                                | 58                              | 58                             | 58                             |
| 504         | Potassium iodide                                                                             | 7681-11-0    | 0.1%                    | 45                     | 45                                | 45                              | 45                             | 45                             |
| 505         | Powervis                                                                                     | Proprietary  | 0.1%                    | --                     | --                                | --                              | --                             | --                             |
| 506         | Proprietary blend of complex stearates                                                       | Proprietary  | 0.1%                    | 791                    | 791                               | 791                             | 791                            | 791                            |
| 507         | Pumice                                                                                       | 1332-09-8    | 0.1%                    | 599                    | 599                               | 599                             | 599                            | 599                            |
| 508         | RCI 07289 corrosion inhibitor                                                                | Proprietary  | 0.1%                    | --                     | --                                | --                              | --                             | --                             |
| 509         | SA-1015                                                                                      | Proprietary  | 0.1%                    | --                     | --                                | --                              | --                             | --                             |

| <b>Rank</b> | <b>Constituent</b>                                                    | <b>CASRN</b> | <b>Freq. of use (%)</b> | <b>Total mass (kg)</b> | <b>Median mass per event (kg)</b> | <b>Mean mass per event (kg)</b> | <b>Min mass per event (kg)</b> | <b>Max mass per event (kg)</b> |
|-------------|-----------------------------------------------------------------------|--------------|-------------------------|------------------------|-----------------------------------|---------------------------------|--------------------------------|--------------------------------|
| 510         | Salt of amine/carbonyl condensate                                     | Proprietary  | 0.1%                    | --                     | --                                | --                              | --                             | --                             |
| 511         | Silica sand gravel                                                    | Proprietary  | 0.1%                    | 6,350                  | 6,350                             | 6,350                           | 6,350                          | 6350                           |
| 512         | Silica, crystalline, quartz                                           | Proprietary  | 0.1%                    | 15                     | 15                                | 15                              | 15                             | 15                             |
| 513         | Sodium borosilicate                                                   | 50815-87-7   | 0.1%                    | 1,361                  | 1,361                             | 1,361                           | 1,361                          | 1,361                          |
| 514         | Sodium polyacrylate/<br>polycrylamide                                 | Proprietary  | 0.1%                    | --                     | --                                | --                              | --                             | --                             |
| 515         | Sodium salt                                                           | Proprietary  | 0.1%                    | --                     | --                                | --                              | --                             | --                             |
| 516         | Ss 26 in xylene                                                       | Proprietary  | 0.1%                    | --                     | --                                | --                              | --                             | --                             |
| 517         | Ssp-40 in xylene                                                      | Proprietary  | 0.1%                    | --                     | --                                | --                              | --                             | --                             |
| 518         | Starch                                                                | 9005-25-8    | 0.1%                    | 522                    | 522                               | 522                             | 522                            | 522                            |
| 519         | Sulfonated polymer                                                    | Proprietary  | 0.1%                    | --                     | --                                | --                              | --                             | --                             |
| 520         | Sulfonic acids, C14-16-alkane hydroxy and C14-16-alkene, sodium salts | 68439-57-6   | 0.1%                    | 5.4                    | 5.4                               | 5.4                             | 5.4                            | 5.4                            |
| 521         | Surfactant blend                                                      | Proprietary  | 0.1%                    | --                     | --                                | --                              | --                             | --                             |
| 522         | Thioglycolic acid                                                     | 68-11-1      | 0.1%                    | 98                     | 98                                | 98                              | 98                             | 98                             |
| 523         | Thrutrol                                                              | Proprietary  | 0.1%                    | --                     | --                                | --                              | --                             | --                             |
| 524         | Tuned Spacer III                                                      | Proprietary  | 0.1%                    | --                     | --                                | --                              | --                             | --                             |
| 525         | Wood dust                                                             | Proprietary  | 0.1%                    | 163                    | 163                               | 163                             | 163                            | 163                            |
