# Supplementary material for: Comparison of chemical-use between hydraulic fracturing, acidizing, and routine oil and gas development
Source: PubMed Central journal article supplement (PMC5396893; doi:10.1371/journal.pone.0175344), 2017-04-19
Supplement: pone.0175344.s002.pdf [file pone.0175344.s002.pdf]

**S2 Table. The top 10% median masses of additives used in routine oil and gas development activities (exclusive of well stimulation) in the SCAQMD, June 4, 2013 to September 2, 2015. Total number of events is 1,187.**

| <b>Constituent</b>                             | <b>CASRN</b> | <b>Freq. of use (%)</b> | <b>Total mass (kg)</b> | <b>Median mass per event (kg)</b> | <b>Mean mass per event (kg)</b> | <b>Min mass per event (kg)</b> | <b>Max mass per event (kg)</b> |
|------------------------------------------------|--------------|-------------------------|------------------------|-----------------------------------|---------------------------------|--------------------------------|--------------------------------|
| Petroleum distillates                          | 64741-44-2   | 0.1%                    | 138,679                | 138,679                           | 138,679                         | 138,679                        | 138,679                        |
| Petroleum distillates                          | 64742-46-7   | 0.1%                    | 138,679                | 138,679                           | 138,679                         | 138,679                        | 138,679                        |
| Water base fluid                               | 7732-18-5    | 97.6%                   | 196,128,245            | 48,117                            | 169,514                         | -                              | 4,483,250                      |
| Water (including mix water supplied by client) | Proprietary  | 0.5%                    | 159,143                | 27,193                            | 26,524                          | 24,310                         | 27,540                         |
| Portland cement                                | 65997-15-1   | 24.9%                   | 7,427,597              | 22,481                            | 25,178                          | 93                             | 106,583                        |
| Barium sulfate                                 | 7727-43-7    | 23.9%                   | 7,639,223              | 20,544                            | 26,899                          | 14                             | 540,586                        |
| Calcium carbonate                              | 471-34-1     | 21.7%                   | 2,719,556              | 9,319                             | 10,541                          | 1                              | 147,567                        |
| Silica                                         | 61790-53-2   | 0.2%                    | 16,520                 | 8,260                             | 8,260                           | 5,414                          | 11,107                         |
| Crystalline silica quartz                      | 14808-60-7   | 40.1%                   | 3,917,132              | 7,165                             | 8,229                           | 7                              | 65,385                         |
| Potassium chloride                             | 7447-40-7    | 40.2%                   | 28,907,629             | 7,035                             | 60,603                          | 0                              | 1,136,781                      |
| Silica sand gravel                             | Proprietary  | 0.1%                    | 6,350                  | 6,350                             | 6,350                           | 6,350                          | 6,350                          |
| Magnesium                                      | 7439-95-4    | 7.5%                    | 471,029                | 4,941                             | 5,292                           | 489                            | 82,343                         |
| Ashes (residues), coal                         | 68131-74-8   | 1.9%                    | 127,226                | 4,112                             | 5,532                           | 1,007                          | 23,689                         |
| Gypsum                                         | 13397-24-5   | 24.3%                   | 310,276,445            | 2,771                             | 1,073,621                       | 9                              | 309,126,252                    |
| Saponite                                       | 1319-41-1    | 17.9%                   | 835,598                | 2,722                             | 3,923                           | 91                             | 63,299                         |
| Glassy calcium magnesium phosphate             | 65997-17-3   | 1.9%                    | 51,860                 | 2,138                             | 2,357                           | 490                            | 4,658                          |
| Silica                                         | 7631-86-9    | 21.6%                   | 843,816                | 2,098                             | 3,296                           | 0                              | 132,997                        |
| Sulfonate                                      | Proprietary  | 23.2%                   | 500,337                | 1,746                             | 1,939                           | 68                             | 10,047                         |
| Magnesium oxide                                | 1309-48-4    | 24.3%                   | 445,681                | 1,474                             | 1,542                           | 2                              | 7,230                          |
| Limestone                                      | 1317-65-3    | 22.0%                   | 448,313                | 1,456                             | 1,718                           | 6                              | 11,113                         |
| Anionic acrylamide copolymer                   | Proprietary  | 5.9%                    | 100,992                | 1,451                             | 1,554                           | 476                            | 4,173                          |
| Calcium oxide                                  | 1305-78-8    | 24.4%                   | 440,651                | 1,433                             | 1,519                           | 5                              | 7,413                          |
| Sodium polyacrylate                            | Proprietary  | 16.8%                   | 318,807                | 1,383                             | 1,602                           | 181                            | 11,181                         |
| Sodium borosilicate                            | 50815-87-7   | 0.1%                    | 1,361                  | 1,361                             | 1,361                           | 1,361                          | 1,361                          |
| Hydrochloric acid                              | 7647-01-0    | 54.8%                   | 1,165,757              | 1,311                             | 1,791                           | 10                             | 12,052                         |
| Mica                                           | 12001-26-2   | 21.2%                   | 379,060                | 1,174                             | 1,504                           | 1                              | 37,265                         |
| Phosphate ester                                | Proprietary  | 0.1%                    | 1,073                  | 1,073                             | 1,073                           | 1,073                          | 1,073                          |
| Coal, <5% SiO2                                 | Proprietary  | 0.6%                    | 9,081                  | 1,057                             | 1,297                           | 420                            | 3,157                          |
| Cellulose, carboxymethyl ether, sodium salt    | 9004-32-4    | 22.7%                   | 287,308                | 953                               | 1,068                           | 23                             | 6,622                          |

| <b>Constituent</b>                            | <b>CASRN</b> | <b>Freq. of use (%)</b> | <b>Total mass (kg)</b> | <b>Median mass per event (kg)</b> | <b>Mean mass per event (kg)</b> | <b>Min mass per event (kg)</b> | <b>Max mass per event (kg)</b> |
|-----------------------------------------------|--------------|-------------------------|------------------------|-----------------------------------|---------------------------------|--------------------------------|--------------------------------|
| Proprietary materials                         | Proprietary  | 0.2%                    | 1,678                  | 839                               | 839                             | 272                            | 1,406                          |
| Guar gum                                      | 9000-30-0    | 0.3%                    | 1,667                  | 819                               | 556                             | 3                              | 845                            |
| Proprietary blend of complex stearates        | Proprietary  | 0.1%                    | 791                    | 791                               | 791                             | 791                            | 791                            |
| Sawdust                                       | Proprietary  | 0.2%                    | 1,474                  | 737                               | 737                             | 590                            | 885                            |
| Sulfuric acid, barium salt (1:1)              | Proprietary  | 0.3%                    | 3,311                  | 726                               | 828                             | 680                            | 1,179                          |
| Polyphosphate ester                           | Proprietary  | 0.2%                    | 1,436                  | 718                               | 718                             | 26                             | 1,410                          |
| Wood fiber                                    | Proprietary  | 0.2%                    | 1,402                  | 701                               | 701                             | 27                             | 1,374                          |
| Plaster of paris                              | 26499-65-0   | 0.2%                    | 1,394                  | 697                               | 697                             | 697                            | 697                            |
| Mullite                                       | 1302-93-8    | 1.8%                    | 14,867                 | 641                               | 708                             | 147                            | 1,398                          |
| Aluminum oxide                                | 1344-28-1    | 21.5%                   | 235,967                | 624                               | 925                             | 0                              | 13,737                         |
| Pumice                                        | 1332-09-8    | 0.1%                    | 599                    | 599                               | 599                             | 599                            | 599                            |
| Bentonite                                     | 1302-78-9    | 24.8%                   | 708,757                | 570                               | 2,427                           | 7                              | 217,271                        |
| Fumes, silica                                 | 69012-64-2   | 18.9%                   | 186,990                | 570                               | 835                             | 6                              | 4,325                          |
| Vegetable and polymer fibers                  | Proprietary  | 1.7%                    | 562                    | 562                               | 562                             | 562                            | 562                            |
| Etidronic acid                                | 2809-21-4    | 1.2%                    | 8,001                  | 543                               | 571                             | 240                            | 1,350                          |
| Lignosulfonic acid, ethoxylated, sodium salts | 68611-14-3   | 0.1%                    | 543                    | 543                               | 543                             | 543                            | 543                            |
| Natural peat                                  | Proprietary  | 0.2%                    | 1,073                  | 536                               | 536                             | 352                            | 721                            |
| Starch                                        | 9005-25-8    | 0.1%                    | 522                    | 522                               | 522                             | 522                            | 522                            |
| Humic acid                                    | 1415-93-6    | 1.6%                    | 10,171                 | 516                               | 535                             | 90                             | 1,168                          |
| Walnut shells                                 | Proprietary  | 0.5%                    | 3,538                  | 488                               | 590                             | 113                            | 1,111                          |
| Mineral fiber                                 | Proprietary  | 1.8%                    | 11,097                 | 467                               | 528                             | 23                             | 1,728                          |
| Ammonium chloride                             | 12125-02-9   | 48.4%                   | 421,116                | 454                               | 732                             | <1                             | 18,847                         |
| Cellulose, microcrystalline                   | 9004-34-6    | 13.1%                   | 120,351                | 431                               | 776                             | <1                             | 17,760                         |
| Disodium metasilicate                         | 6834-92-0    | 23.4%                   | 93,416                 | 367                               | 336                             | <1                             | 10,135                         |
