# Supplementary material for: Comparison of chemical-use between hydraulic fracturing, acidizing, and routine oil and gas development
Source: PubMed Central journal article supplement (PMC5396893; doi:10.1371/journal.pone.0175344), 2017-04-19
Supplement: pone.0175344.s003.pdf [file pone.0175344.s003.pdf]

**S3 Table. Chemicals reported to the SCAQMD and used in routine oil and gas production for which experimental toxicity information could not be located (N=97).**

| Chemical name                                                                                                                       | CASRN       |
|-------------------------------------------------------------------------------------------------------------------------------------|-------------|
| MBNPA (2-bromo-3-nitrilopropionamide)                                                                                               | 1113-55-9   |
| 1-tetradecene                                                                                                                       | 1120-36-1   |
| Silica gel                                                                                                                          | 112926-00-8 |
| Quaternary ammonium compounds, benzyl(hydrogenated tallow alkyl)dimethyl, stearates, salts with bentonite                           | 121888-68-4 |
| Mullite                                                                                                                             | 1302-93-8   |
| 1,2-Ethanediaminium, N1,N2-bis[2-[bis(2-hydroxyethyl)methylammonio]ethyl]-N1,N2-bis(2-hydroxyethyl)-N1,N2-dimethyl-, chloride (1:4) | 138879-94-4 |
| Cristobalite                                                                                                                        | 14464-46-1  |
| Talc                                                                                                                                | 14807-96-6  |
| Vinylidene chloride/methylacrylate copolymer                                                                                        | 25038-72-6  |
| Polyacrylamide                                                                                                                      | 26006-22-4  |
| Monoethanolamine borate (1:x)                                                                                                       | 26038-87-9  |
| 1-eicosene                                                                                                                          | 3452-07-1   |
| Polypichlorohydrin, trimethyl amine quaternized                                                                                     | 51838-31-4  |
| 1,2,3-Trimethylbenzene                                                                                                              | 526-73-8    |
| Silanetriol, 1-(3-aminopropyl)-                                                                                                     | 58160-99-9  |
| Ethyloctynol                                                                                                                        | 5877-42-9   |
| Silicon dioxide crystalline                                                                                                         | 60676-86-0  |
| Formaldehyde, polymer with 2-methyloxirane, 4-nonylphenol and oxirane                                                               | 63428-92-2  |
| Glassy calcium magnesium phosphate                                                                                                  | 65997-17-3  |
| Alcohols, C10-14, ethoxylated                                                                                                       | 66455-15-0  |
| Silanetriol, (3-aminopropyl)-, homopolymer                                                                                          | 68400-07-7  |
| Thiourea, polymer with formaldehyde and 1-phenylethanone                                                                            | 68527-49-1  |
| Benzenesulfonic acid, c10-16-alkyl derivs., compds. with 2-propanamine                                                              | 68584-24-7  |
| Benzenesulfonic acid, c10-16-alkyl derivs., compds. with triethanolamine                                                            | 68584-25-8  |
| Hydrocarbons, terpene processing by-products                                                                                        | 68956-56-9  |
| Petroleum distillates                                                                                                               | 68990-35-2  |
| Tricalcium phosphate                                                                                                                | 7758-87-4   |
| Lecithins                                                                                                                           | 8002-43-5   |
| Sulfuric acid, calcium salt, hydrate (2:2:1)                                                                                        | 10034-76-1  |
| 1-propanesulfonic acid, 2-methyl-2-[(1-oxo-2-propenyl)amino]-, monoammonium salt, polymer with 2-propenamide                        | 110897-64-8 |
| Mica                                                                                                                                | 12001-26-2  |
| Gilsonite                                                                                                                           | 12002-43-6  |
| Canola oil                                                                                                                          | 120962-03-0 |
| Potassium oxide                                                                                                                     | 12136-45-7  |
| Aluminum oxide silicate                                                                                                             | 12141-46-7  |
| Sodium oxide                                                                                                                        | 12401-86-4  |
| Diutan                                                                                                                              | 125005-87-0 |
| Undecanol, branched and linear                                                                                                      | 128973-77-3 |
| Sodium aluminate                                                                                                                    | 1302-42-7   |
| Calcium oxide                                                                                                                       | 1305-78-8   |
| Limestone                                                                                                                           | 1317-65-3   |
| Saponite                                                                                                                            | 1319-41-1   |
| Dodecyl(2-hydroxy-3-sulfonatopropyl)dimethylammonium                                                                                | 13197-76-7  |
| Pumice                                                                                                                              | 1332-09-8   |
| Gypsum                                                                                                                              | 13397-24-5  |
| Lithium chlorate                                                                                                                    | 13453-71-9  |
| Humic acid                                                                                                                          | 1415-93-6   |

| Chemical name                                                                                                                                                        | CASRN       |
|----------------------------------------------------------------------------------------------------------------------------------------------------------------------|-------------|
| 1-propanaminium, n-(carboxymethyl)-n,n-dimethyl-3-(((13z)-1-oxo-13-docosenyl)amino)-, inner salt                                                                     | 149879-98-1 |
| Trydymite                                                                                                                                                            | 15468-32-3  |
| Cyclohexamine sulfate                                                                                                                                                | 19834-02-7  |
| Acrylic polymer                                                                                                                                                      | 203008-81-5 |
| Acetic acid ethenyl ester, polymer with choroethene and ethene                                                                                                       | 25085-46-5  |
| 2-propenoic acid, 2-methyl-, polymer with 2-propenoic acid                                                                                                           | 25751-21-7  |
| Plaster of paris                                                                                                                                                     | 26499-65-0  |
| Diisopropyl-naphthalenesulfonic acid                                                                                                                                 | 28757-00-8  |
| Formaldehyde, polymer with 4-(1,1-dimethylethyl)phenol, 2-methyloxirane and oxirane                                                                                  | 30704-64-4  |
| Calcium magnesium oxide                                                                                                                                              | 37247-91-9  |
| 2-butenedioic acid (e)-, polymer with 1,2-ethanediol and .alpha.,.alpha.?-[(1-methylethylidene)di-4,1-phenylene]bis[.omega.-hydroxypoly[oxy(methyl-1,2-ethanediyl)]] | 39382-21-3  |
| Coal, ground                                                                                                                                                         | 50815-10-6  |
| Sodium borosilicate                                                                                                                                                  | 50815-87-7  |
| Sodium gluconate                                                                                                                                                     | 527-07-1    |
| 1-octanesulfonic acid sodium salt                                                                                                                                    | 5324-84-5   |
| Poly(oxy-1,2-ethanediyl), .alpha.-[bis(1-methylpropyl)phenyl]-.omega.-hydroxy-                                                                                       | 53964-94-6  |
| Silica                                                                                                                                                               | 61790-53-2  |
| Petroleum resins                                                                                                                                                     | 64742-16-1  |
| Petroleum distillates                                                                                                                                                | 64742-46-7  |
| Sulfurous acid, sodium salt (1:1), polymer with formaldehyde and 1,3,5-triazine-2,4,6-triamine                                                                       | 64787-97-9  |
| Esters of rosin oligomers with pentaerythritol                                                                                                                       | 65997-12-8  |
| Portland cement                                                                                                                                                      | 65997-15-1  |
| Fatty acids, tall-oil, reaction products with triethanolamine                                                                                                        | 67784-78-5  |
| 4,7-methano-1h-indene, 3a,4,7,7a-tetrahydro-, polymer with 1,3-cyclopentadiene, cyclopentene, 1-hexene, 2-methyl-2-butene and 1,3-pentadiene                         | 68003-51-0  |
| Poly(oxy-1,2-ethanediyl), .alpha.-sulfo-.omega.-hydroxy-, c6-10-alkyl ethers, ammonium salts                                                                         | 68037-05-8  |
| Poly(oxy-1,2-ethanediyl), .alpha.-isodecyl-.omega.-hydroxy-, phosphate, potassium salt                                                                               | 68071-17-0  |
| Ashes (residues), coal                                                                                                                                               | 68131-74-8  |
| Lignosulfonic acid, ethoxylated, sodium salts                                                                                                                        | 68611-14-3  |
| Amide surfactant                                                                                                                                                     | 68647-77-8  |
| Ethanol,2,2'-oxybis-,reactionproductswithammonia,morpholinederivs.residues                                                                                           | 68909-77-3  |
| Fumes, silica                                                                                                                                                        | 69012-64-2  |
| Welan gum                                                                                                                                                            | 72121-88-1  |
| Magnesium                                                                                                                                                            | 7439-95-4   |
| Tall oil                                                                                                                                                             | 8002-26-4   |
| Compound synthetic diesters                                                                                                                                          | 8029-39-8   |
| Fuller's earth                                                                                                                                                       | 8031-18-3   |
| 2-propenoic acid, polymer with 2-propenamide                                                                                                                         | 9003-06-9   |
| Polypropylene                                                                                                                                                        | 9003-07-0   |
| Cellulose, 2-hydroxyethyl ether                                                                                                                                      | 9004-62-0   |
| Starch                                                                                                                                                               | 9005-25-8   |
| Lignin                                                                                                                                                               | 9005-53-2   |
| Cellophane                                                                                                                                                           | 9005-81-6   |
| Naphthalenesulfonate-formaldehyde condensate, sodium salt                                                                                                            | 9008-63-3   |
| 2-propenoic acid, polymer with sodium 2-propenoate                                                                                                                   | 9033-79-8   |

| <b>Chemical name</b>                                 | <b>CASRN</b> |
|------------------------------------------------------|--------------|
| Maltodextrin                                         | 9050-36-6    |
| Aluminium distearate                                 | 300-92-5     |
| Acetic acid ethenyl ester, polymer with ethanol      | 25213-24-5   |
| Benzene, tetrapropylene-                             | 25265-78-5   |
| L-Glutamic acid, N,N-Diacetic acid, Tetrasodium salt | 51981-21-6   |
| L-Glutamic acid, N,N-Diacetic acid                   | 58976-65-1   |
