# Supplementary material for: Comparison of chemical-use between hydraulic fracturing, acidizing, and routine oil and gas development
Source: PLoS One. 2017 Apr 19;12(4):e0175344. doi: 10.1371/journal.pone.0175344 (PMC5396893; doi:10.1371/journal.pone.0175344)
Supplement: S4 Table — (PDF) [file pone.0175344.s004.pdf]

**S4 Table. Chemicals reported to the SCAQMD and used in routine oil and gas development activities considered chemicals of concern based on six reference lists consulted.**

| <b>Chemical name</b>                             | <b>CASRN</b> | <b>European Chemicals Agency Candidate List of Substances of Very High Concern</b> | <b>U.S. EPA Contaminant Candidate List (CCL) 4</b> | <b>U.S. EPA National Primary Drinking Water Standard and Health Advisory Chemicals List</b> | <b>Chemicals known to the state of California to cause cancer or reproductive toxicity (Prop 65)</b> | <b>California EPA Toxic Air Contaminant (TAC) List<sup>a</sup></b> | <b>OSPAR Substances of Possible Concern</b> |
|--------------------------------------------------|--------------|------------------------------------------------------------------------------------|----------------------------------------------------|---------------------------------------------------------------------------------------------|------------------------------------------------------------------------------------------------------|--------------------------------------------------------------------|---------------------------------------------|
| 1,2,4-Trimethylbenzene                           | 95-63-6      |                                                                                    |                                                    | X                                                                                           |                                                                                                      | 4b                                                                 |                                             |
| 1,3,5-Trimethylbenzene                           | 108-67-8     |                                                                                    |                                                    | X                                                                                           |                                                                                                      |                                                                    |                                             |
| 1-butanol                                        | 71-36-3      |                                                                                    | X                                                  |                                                                                             |                                                                                                      | 4b                                                                 |                                             |
| 2-Butoxyethanol<br>(Ethylene glycol butyl ether) | 111-76-2     |                                                                                    |                                                    |                                                                                             |                                                                                                      | 2a                                                                 |                                             |
| Acetophenone                                     | 98-86-2      |                                                                                    |                                                    |                                                                                             |                                                                                                      | 4a                                                                 |                                             |
| Acrylamide                                       | 79-06-1      | X                                                                                  |                                                    | X                                                                                           | X                                                                                                    |                                                                    |                                             |
| Aluminum                                         | 7429-90-5    |                                                                                    |                                                    |                                                                                             |                                                                                                      | 4b                                                                 |                                             |
| Ammonium sulfate                                 | 7783-20-2    |                                                                                    |                                                    |                                                                                             |                                                                                                      | 4b                                                                 |                                             |
| Boric acid                                       | 10043-35-3   | X                                                                                  |                                                    |                                                                                             |                                                                                                      |                                                                    |                                             |
| Boron sodium oxide                               | 1330-43-4    | X                                                                                  |                                                    |                                                                                             |                                                                                                      |                                                                    |                                             |
| Diethanolamine                                   | 111-42-2     |                                                                                    |                                                    |                                                                                             | X                                                                                                    | 2a                                                                 |                                             |
| Ethylbenzene                                     | 100-41-4     |                                                                                    |                                                    | X                                                                                           | X                                                                                                    | 2a                                                                 |                                             |
| Ethylene glycol                                  | 107-21-1     |                                                                                    | X                                                  | X                                                                                           | X                                                                                                    | 2a                                                                 |                                             |
| Ethylene oxide                                   | 75-21-8      |                                                                                    | X                                                  |                                                                                             | X                                                                                                    |                                                                    |                                             |
| Formaldehyde                                     | 50-00-0      |                                                                                    | X                                                  | X                                                                                           | X                                                                                                    | 2a                                                                 |                                             |
| Glutaraldehyde                                   | 111-30-8     |                                                                                    |                                                    |                                                                                             |                                                                                                      | 2b                                                                 |                                             |
| Isopropanol                                      | 67-63-0      |                                                                                    |                                                    |                                                                                             |                                                                                                      | 2b                                                                 |                                             |
| Isopropylbenzene                                 | 98-82-8      |                                                                                    |                                                    | X                                                                                           | X                                                                                                    | 4a                                                                 |                                             |
| Lithium carbonate                                | 554-13-2     |                                                                                    |                                                    |                                                                                             | X                                                                                                    |                                                                    |                                             |
| Methanol                                         | 67-56-1      |                                                                                    | X                                                  |                                                                                             | X                                                                                                    | 2a                                                                 |                                             |
| Naphthalene                                      | 91-20-3      |                                                                                    |                                                    | X                                                                                           | X                                                                                                    |                                                                    |                                             |
| Nitrilotriacetic acid                            | 139-13-9     |                                                                                    |                                                    |                                                                                             | X                                                                                                    | 4b                                                                 |                                             |
| Phosphoric acid                                  | 7664-38-2    |                                                                                    |                                                    |                                                                                             |                                                                                                      | 2b                                                                 |                                             |
| Quinoline                                        | 91-22-5      |                                                                                    | X                                                  |                                                                                             |                                                                                                      | 5                                                                  |                                             |
| Silica                                           | 7631-86-9    |                                                                                    |                                                    |                                                                                             |                                                                                                      | 3                                                                  |                                             |
| Sodium hydroxide                                 | 1310-73-2    |                                                                                    |                                                    |                                                                                             |                                                                                                      | 2b                                                                 |                                             |
| Sulfuric acid                                    | 7664-93-9    |                                                                                    |                                                    |                                                                                             |                                                                                                      | 2b                                                                 |                                             |

| <b>Chemical name</b>                                | <b>CASRN</b> | <b>European Chemicals Agency Candidate List of Substances of Very High Concern</b> | <b>U.S. EPA Contaminant Candidate List (CCL) 4</b> | <b>U.S. EPA National Primary Drinking Water Standard and Health Advisory Chemicals List</b> | <b>Chemicals known to the state of California to cause cancer or reproductive toxicity (Prop 65)</b> | <b>California EPA Toxic Air Contaminant (TAC) List<sup>a</sup></b> | <b>OSPAR Substances of Possible Concern</b> |
|-----------------------------------------------------|--------------|------------------------------------------------------------------------------------|----------------------------------------------------|---------------------------------------------------------------------------------------------|------------------------------------------------------------------------------------------------------|--------------------------------------------------------------------|---------------------------------------------|
| Toluene                                             | 108-88-3     |                                                                                    |                                                    | X                                                                                           | X                                                                                                    | 2a                                                                 |                                             |
| Xylenes                                             | 1330-20-7    |                                                                                    |                                                    | X                                                                                           |                                                                                                      | 2a                                                                 |                                             |
| Poly(oxy-1,2-ethandiyl), a-(nonylphenyl)-w-hydroxy- | 9016-45-9    |                                                                                    |                                                    |                                                                                             |                                                                                                      |                                                                    | X                                           |
| Bis(isopropyl)naphthalene                           | 38640-62-9   |                                                                                    |                                                    |                                                                                             |                                                                                                      |                                                                    | X                                           |

<sup>a</sup>**Category 2a** – Substances identified as Toxic Air Contaminants, known to be emitted in California, with one or more health values under development by the Office of Environmental Health Hazard Assessment for review by the Scientific Review Panel, **Category 2b** – Substances NOT identified as Toxic Air Contaminants, known to be emitted in California, with one or more health values under development by the Office of Environmental Health Hazard Assessment for review by the Scientific Review Panel, **Category 3** – Substances known to be emitted in California and are NOMINATED for development of health values or additional health values, **Category 4a** – Substance identified as Toxic Air Contaminants, known to be emitted in California and are TO BE EVALUATED for entry into Category III, **Category 4b** – Substance NOT identified as Toxic Air Contaminants, known to be emitted in California and are TO BE EVALUATED for entry into Category III, **Category 5** – Substance identified as Toxic Air Contaminants, and NOT KNOWN TO BE EMITTED from stationary source facilities in California
